# Supplementary material
Source: publisher figshare collection journal article supplement (https://gsapubs.figshare.com/ndownloader/files/22744889)
Supplement: Supplementary file 1 [file 22744889]

| Depth (m) | Munsell Colour                             | Texture                                                         | Induration/<br>sorting                                               | Bedding structures                                    | HCl reaction*              | Inferred depositional<br>environment         | Additional comments                                                                                                                                    |
|-----------|--------------------------------------------|-----------------------------------------------------------------|----------------------------------------------------------------------|-------------------------------------------------------|----------------------------|----------------------------------------------|--------------------------------------------------------------------------------------------------------------------------------------------------------|
| 0-102     | 5YR7/6 yellowish red                       | fine sand, medium in places                                     | very well sorted                                                     | bimodal laminations                                   | o                          | eolian                                       | core not properly formed in places                                                                                                                     |
| 103-104   | 5YR5/6 and 6/3                             | fine and medium sand                                            | well sorted                                                          | laminated                                             | x                          | interdune?                                   | 1st place core formed properly                                                                                                                         |
| 104-107   | 10YR8/1-10YR6/2                            | cemented fine sand                                              |                                                                      | none obvious                                          | xx                         | interdune complex                            |                                                                                                                                                        |
| 107-112   | 7.5YR5/6 to 7/2                            | very fine sand, cemented near base                              | conglomeratic (i.e., very poorly sorted) texture at base             |                                                       | variable*                  |                                              | 107 o, rest x highly calcareous                                                                                                                        |
| 112-114   | CORE MISSING                               |                                                                 |                                                                      |                                                       |                            |                                              |                                                                                                                                                        |
| 114-117   | 10YR8/1-7/1 white - light grey             | ca;careous cemented sand                                        |                                                                      |                                                       |                            | sandy interdune, Poss some fluvial input     | 114-115 large scale gypsum crystals up to 5cm                                                                                                          |
| 117-118   | 2.5Y8/1 white                              | highly cemented silt - siltstone                                |                                                                      | veins of ?gypsum in places                            | xx rapid                   | standing water body (interdune/lacust)       |                                                                                                                                                        |
| 118-120   | 10YR8/1-10YR7/2 white - light grey         | highly cemented fine sand and silts sand                        |                                                                      | none                                                  | xx but delayed - dolomite? | playa/sabkha deposit                         | (dolomite)                                                                                                                                             |
| 120-121   | CORE MISSING                               |                                                                 |                                                                      |                                                       |                            |                                              |                                                                                                                                                        |
| 121-130   | 2.5YR7/2 pale red                          | fine sand, highly cemented in places                            | well sorted                                                          |                                                       | 126-7 (cm) x elsewhere o   | eolian                                       | strong overprinting with vadose zone processes - area > water table (saturated zone)                                                                   |
| 131-132   | CORE MISSING                               |                                                                 |                                                                      |                                                       |                            |                                              |                                                                                                                                                        |
| 132-134   | 2.5YR8/1 mixed with 2.5YR5/4 reddish brown | primarily cemented fine sand with in places cemented sandy silt | fine sand                                                            | cross bed structures preserved                        | varied                     | highly modified dune, Poss fluvial influence |                                                                                                                                                        |
| 135-135.5 | 3.5YR7/1 and 2.5YR8/1                      | matrix supported by sandy conglomerate                          | rounded clasts, range of sizes                                       |                                                       |                            | wadi/flood deposit                           | classic 'risotto' texture probably related to bioturbation in standing water/fluvial environment                                                       |
| 135.5-136 | 2.5YR5/4 mixed with 2.5YR8/1               | cemented fine sand                                              |                                                                      | laminations defined by colours                        | weak                       | eolian                                       |                                                                                                                                                        |
| 136-147   | 2.5YR6/3                                   | cemented fine sand                                              | well sorted                                                          |                                                       | variable x-xx              | dune/interdune complex                       | very thin marl (30cm) at 144/7-145m                                                                                                                    |
| 147.9     |                                            |                                                                 |                                                                      | ripple cross beds black laminations (heavy minerals). |                            |                                              | ?? At wet phase initiation overlies siltstone capped by 2.5YR8/2 - 2.5YR2.5/1 current bedded (ripples) heavy mineral laminations uncemented fine sand. |
| 148-149   | 10YR8/1 white                              | cemented silt                                                   |                                                                      | none                                                  |                            | interdune/lacust capped by thin fluvial      |                                                                                                                                                        |
| 149-151.5 | 2.5YR6/4                                   | moderately cemented fine sand                                   | very well sorted                                                     | scarcely laminated                                    |                            | eolian                                       |                                                                                                                                                        |
| 151.5-153 | 10YR7/3-10YR7/1                            | silty sand                                                      | highly cemented                                                      |                                                       | very xx in places          | interdune/lacustrine                         | very extensive in situ precipitation of carbonates (calcrete nodules) downwards change in colour towards next unit                                     |
| 153-155.5 | 2.5YR5/4 base 2.5YR7/2 top                 | highly cemented fine sand                                       | very well sorted                                                     | none visible                                          | xx                         | eolian                                       | mottles 2.5YR8/1 calcrete nodules throughout                                                                                                           |
| 155.5-157 | 5YR8/1 mixed with 5YR7/2                   | fine sand with small medium content                             | highly cemented                                                      |                                                       | rigorous                   | interdune deposit                            | highly calcareous                                                                                                                                      |
| 157-158   | mix of 5YR8/1, 7/2, 5/6                    | fine sand, extensive in situ chemical cementation               | highly cemented                                                      |                                                       | in places xx               | inland sabkha?                               | important sabkha deposit, salty, clasts in a fine matrix                                                                                               |
| 158-159   | 2.5YR7/2                                   | silt, no sand fraction                                          | highly cemented                                                      | none obvious, some mottling features                  | very delayed               | standing water/lacustrine/interdune/sabkha   | high dolomite concentration (delayed HCl reaction)                                                                                                     |
| 159-160   | 2.5YR5/8 red                               | fine sand                                                       | very well sorted                                                     | none                                                  | o-x                        | eolian                                       | carbonate nodules - mottling pattern                                                                                                                   |
| 160-164   | 10YR8/1 ad 10YR7/2                         | sand                                                            | extensive cementn incl discrete lenses of gypsum, zones of conc salt |                                                       | delayed - dolomite?        | extensive playa/sabkha basin                 | large gypsum crystals                                                                                                                                  |
| 164-166   | 2.5YR5/4-5/6                               | fine sand                                                       | very well sorted                                                     |                                                       |                            | eolian                                       | carbonate nodules and other mottles throughout                                                                                                         |

| 166-168                                                                                                                                   | 2.5Y7.2 light grey                                        | silt                                                                         | highly cemented                      | Table DR1<br>presvn ripple lamins + xbeds<br>(planar +trough) enhanced by<br>post-dep iron ppn |                                 | slackwater playa/sabkha deposit                                         | extensive veins of gypsum (up to 5cm thick)<br>vertical stretch>30cm (tee pee structures?)                                                                                                                          |
|-------------------------------------------------------------------------------------------------------------------------------------------|-----------------------------------------------------------|------------------------------------------------------------------------------|--------------------------------------|------------------------------------------------------------------------------------------------|---------------------------------|-------------------------------------------------------------------------|---------------------------------------------------------------------------------------------------------------------------------------------------------------------------------------------------------------------|
| 168-169                                                                                                                                   | 10R5/6 red                                                | sand                                                                         | very well sorted,<br>cemented        |                                                                                                |                                 | eolian                                                                  | Data Repository item 2005194                                                                                                                                                                                        |
| Section continues into sequence of highly cemented calcareous and non-calcareous siltstone of considerable antiquity (?miocene or older?) |                                                           |                                                                              |                                      |                                                                                                |                                 |                                                                         |                                                                                                                                                                                                                     |
| Core ID:                                                                                                                                  | LIWA/47                                                   |                                                                              |                                      |                                                                                                |                                 |                                                                         |                                                                                                                                                                                                                     |
|                                                                                                                                           |                                                           |                                                                              |                                      |                                                                                                |                                 |                                                                         |                                                                                                                                                                                                                     |
| Depth (m)                                                                                                                                 | Munsell Colour                                            | Texture                                                                      | Induration/<br>sorting               | Bedding structures                                                                             | HCl reaction*                   | Inferred depositional<br>environment                                    | Additional comments                                                                                                                                                                                                 |
| 0-30                                                                                                                                      | 7.5YR7/6 reddish yellow                                   | fine sand (70-90 um)                                                         | well sorted                          | obliterated                                                                                    | scarce carb x                   | eolian                                                                  |                                                                                                                                                                                                                     |
| 31-48                                                                                                                                     | 7.5YR6/6 reddish yellow                                   | partially cemented fine sand                                                 | well sorted                          | obliterated                                                                                    | xx                              | eolian                                                                  | carbonate nodules up to 5mm diameter<br>(concentration increases with depth), same sand<br>being overmapped with carbonate                                                                                          |
| 49-54                                                                                                                                     | mottling 7.5YR5/6 and<br>7.5YR6/3 and 7.5YR8/2<br>and 8/1 | fine sand                                                                    | well sorted                          | obliterated                                                                                    | instant xx, high<br>cementation | eolian with post-dep carbonate                                          | similar features. Incr carbonate content and<br>cementation progressively                                                                                                                                           |
| 55                                                                                                                                        | CORE MISSING                                              |                                                                              |                                      |                                                                                                |                                 |                                                                         |                                                                                                                                                                                                                     |
| 55-56                                                                                                                                     | 7.5YR8/1                                                  | bleached fine sand                                                           | very very wel sorted                 | some fine laminations and<br>small scale cross-bedding                                         | o                               | eolian-fluvial interface                                                | Big change, uniform sand                                                                                                                                                                                            |
| 56-57                                                                                                                                     | 7.5YR8/1                                                  | claystone/siltstone, marl.                                                   | massive                              |                                                                                                | o-x                             | slack water lake deposit                                                | uniform but scarce iron staining, pure clay                                                                                                                                                                         |
| 57-58                                                                                                                                     |                                                           |                                                                              |                                      |                                                                                                |                                 |                                                                         | sandy clay                                                                                                                                                                                                          |
| 58-61                                                                                                                                     | 10R7/4 pale red and<br>10R8/1 white                       | cemented sand and silt<br>(silty sand), silt content<br>decreases with depth |                                      |                                                                                                |                                 | fluvio-lacustrine, and inferred<br>wadi deposits                        | extensively mottled and bioturbated. Scarece iron<br>staining.                                                                                                                                                      |
| 62-77                                                                                                                                     | 5YR7/2                                                    | sandy silt grading down to<br>silty sand                                     | very well sorted fine<br>sand        | none obvious. Fining upwards<br>sequence of rip up clasts                                      | weak (x)                        | fluvio-lacust                                                           | silt domination in upper 2-3m. Sand dominant<br>rest. Scarce carbonate nodules                                                                                                                                      |
| 66-67                                                                                                                                     |                                                           | conglomerate ('risotto'<br>texture indicative of<br>carbonate rip up clasts) |                                      |                                                                                                |                                 | fluvio-lacust                                                           |                                                                                                                                                                                                                     |
| nr 77                                                                                                                                     | back to 10R7/3                                            |                                                                              |                                      |                                                                                                |                                 |                                                                         |                                                                                                                                                                                                                     |
| 77-78                                                                                                                                     | CORE MISSING                                              |                                                                              |                                      |                                                                                                |                                 |                                                                         |                                                                                                                                                                                                                     |
| 78-88                                                                                                                                     | 10R7/3 w varying concs<br>of 10R8/1                       | very fine sand                                                               | very well sorted                     | low angle fine (heavy minerals<br>in places)                                                   | xx-x                            | eolian                                                                  | iron staining at base (88m), red colour - very fine<br>well sorted texture with laminations, iron mottles<br>5-10% in olaces                                                                                        |
| 88-90                                                                                                                                     | 5YR5/6 yellowish red                                      | fine to medium sand                                                          | well sorted                          | laminated (1-5mm), sub-<br>horizontally bedded                                                 | o                               | eolian-fluvial                                                          | lamination clearly indicated by iron staining                                                                                                                                                                       |
| 90-98.5                                                                                                                                   | 10YR8/1 dominant                                          |                                                                              |                                      |                                                                                                |                                 |                                                                         | extensive mottles of 10YR7/1 and 10YR7/3.<br>Some discrete carbonate nodules                                                                                                                                        |
| 98.5-101.5                                                                                                                                |                                                           | fine sand especially<br>towards base                                         | well sorted, with<br>worm burrowings |                                                                                                | x                               | base eolian, grading up to water-<br>saturated fluvio-lacustrine facies | iron stained mottling, downwards gradation from<br>10R8/1 to 7/1 sand to 10R5/8 sand,<br>concomitant decrease in carbonate and<br>mottling, base - contact boundary on 2.5YR5/6<br>possible liquefaction structures |
| 101.5-116                                                                                                                                 | 10R8/1 in places<br>10R7/11                               | marl, fines dominated (silt,<br>clay)                                        | massive and well<br>sorted           | weak horizontal laminations in<br>places                                                       | weak in places                  | fluvio-lacustrine                                                       | concentration of gypsum bands at 105, 106,<br>109.7, thru 115-116, first sign of massive gypsum<br>in core                                                                                                          |
| 116-117.5                                                                                                                                 | CORE MISSING                                              |                                                                              |                                      |                                                                                                |                                 |                                                                         |                                                                                                                                                                                                                     |
| 117.5-131                                                                                                                                 | notably different from<br>above - grades down<br>from     | marl, clayey silt and silty<br>clay                                          |                                      | scarce secondary bioturbation<br>structures, chaotic gypsum<br>bedding                         | o                               | subaerially exposed evaporative<br>lake                                 | incr conc and thickness of gypsum banding<br>(some bands >10cm and cont thru core),<br>potentially important layer for correlation between<br>cores                                                                 |
|                                                                                                                                           | 10R8/1, 7/1 to 10R5/6                                     |                                                                              |                                      |                                                                                                |                                 |                                                                         |                                                                                                                                                                                                                     |
| 131-                                                                                                                                      | from 7.5YR5/1 to 7.5YR<br>5/4                             | consolidated (cemented)<br>mudstones                                         |                                      |                                                                                                | variable xx to x to o           |                                                                         | widespread mottling, gypsum in variable<br>concentrations throughout, very fine laminations<br>(1-2mm) in places                                                                                                    |
|                                                                                                                                           |                                                           |                                                                              |                                      |                                                                                                |                                 |                                                                         |                                                                                                                                                                                                                     |

|                  |                                           |                                                             |                                                   |                                                               |                      |                                                    |                                                                                                                          |
|------------------|-------------------------------------------|-------------------------------------------------------------|---------------------------------------------------|---------------------------------------------------------------|----------------------|----------------------------------------------------|--------------------------------------------------------------------------------------------------------------------------|
|                  |                                           |                                                             |                                                   | Table DR1                                                     |                      |                                                    | Data Repository item 2005194                                                                                             |
| <b>Core ID:</b>  | LIWA/48                                   |                                                             |                                                   |                                                               |                      |                                                    |                                                                                                                          |
|                  |                                           |                                                             |                                                   |                                                               |                      |                                                    |                                                                                                                          |
| <b>Depth (m)</b> | <b>Munsell Colour</b>                     | <b>Texture</b>                                              | <b>Induration/<br/>sorting</b>                    | <b>Bedding structures</b>                                     | <b>HCl reaction*</b> | <b>Inferred depositional<br/>environment</b>       | <b>Additional comments</b>                                                                                               |
| 8-9              | 7.5YR6/6                                  | consolidated silty fine sand                                | very well sorted                                  | not visible                                                   | xx                   | eolian                                             | possible overprint of pluvial activity                                                                                   |
| 9-12             | 5YR5/6                                    | finse sand consolidated                                     | very well sorted                                  |                                                               | not much reaction    | dry conds. Landscape stability (roses on surface). | must post-dep modification and cementation, abundant precipitated(?) gypsum (sand roses), desert roses of gypsum present |
| 12-17            | downwards gradation<br>7.5YR6/2 to 5YR4/6 | fine sand                                                   |                                                   | well bedded (fine laminations steeply dipping up to 15 deg)   | upper xx lower o     | eolian                                             | downwards gradation light to dark and carbonate to non-carbonate                                                         |
| 17-20.5          | 7.5YR6/6                                  | consolidated fine sand and silt                             |                                                   | no obvious primary structures                                 | xx                   | interdune?                                         |                                                                                                                          |
| 20.5-21          | 5YR4/6                                    | aeolian sand slightly coarser grain size than above + below |                                                   | well bedded finely laminated                                  | o-x                  |                                                    |                                                                                                                          |
| 21-23            | 5YR6/6-5/6                                |                                                             |                                                   | very finely horizontal<br>laminated                           | x                    | interdune - sand and silt laminated                | some mottling/bioturbation                                                                                               |
| 23-37.7          |                                           | very consolidated fine sand                                 | very well sorted                                  | no primary sedimentary structures                             | xx                   | eolian                                             |                                                                                                                          |
| 37.7-46.5        | 10YR8/1-10YR8/2                           | mixed sands and fines, cemented                             |                                                   | none obvious                                                  | xx                   | fluvio-lacust (wadi?)                              | very continuous coring stops sharply (due to less carbonate?) @ 46m, less consolidated                                   |
| 46.5-51          | 10R8/3-10R7/2                             | light pink sands, clean sands - no fines content            | very well sorted                                  | none                                                          | x                    | eolian                                             |                                                                                                                          |
| 51-53            | 10R8/2-8/1                                | risotto 'conglomerate'                                      |                                                   | carbonate granules                                            | xx                   | inferred wadi deposits                             |                                                                                                                          |
| 53-54            | 10R7/2                                    | consolidated sand                                           | well sorted                                       | structureless                                                 |                      | eolian possibly fluvio-lacustrine                  |                                                                                                                          |
| 54-58            | 10R6/1 to 10R6/4 w depth                  | sand                                                        | well sorted                                       | weakly bedded in places                                       | xx                   | fluvio-lacustrine                                  | maybe subaerial due to red colour                                                                                        |
| 58-63            | 5YR8/1                                    | highly cemented sand, high carbonate content                |                                                   | structureless                                                 | xx                   | fluvio-lacustrine                                  | scarce mottling <5%                                                                                                      |
| 63-66            | 10R8/1-10R6/3                             | less consolidated than above sands                          | well sorted. Better cemented pebble concs at base | laminated (defined by heavy minerals*)                        |                      |                                                    | * some dip by up to 12 deg in cross-bedding pattern, pebble-like rip up clasts present                                   |
| 66-67            | CORE MISSING                              |                                                             |                                                   |                                                               |                      |                                                    |                                                                                                                          |
| 67-70            | 10R5/4 to 2.5 YR 5/6                      | semi- to consolidated fine sand                             | very well sorted                                  |                                                               |                      | eolian                                             | iron staining in central metre, mottling <10% throughout.                                                                |
| 70-74            | CORE MISSING                              |                                                             |                                                   |                                                               |                      |                                                    |                                                                                                                          |
| 74-85            | 10R8/1                                    | highly cemented marl, pure claystone, 77-9 marl             |                                                   |                                                               | x-xx                 | lacustrine/fluvial deposit (primarily lacustrine)  | gypsum traces <5% bottom zone                                                                                            |
| 85-87            | All as above with greater                 | concentration of gypsum present                             |                                                   |                                                               |                      |                                                    |                                                                                                                          |
| 87-95            | 10R8/1 to 10R7/8 and scarce 10R5/6        | gypsum-rich v. fine grained (marl) with red staining        |                                                   |                                                               |                      | lacust (?evaporite lake)                           | concentrated anhydrite band 94m                                                                                          |
| 95-104           | 10R8/1 to 10R7/3                          | evaporite v. fine grained vv cemented                       |                                                   | none obvious. Obliterated by evaporite ppn (predom anhydrite) |                      |                                                    |                                                                                                                          |
|                  |                                           |                                                             |                                                   |                                                               |                      |                                                    |                                                                                                                          |
|                  |                                           |                                                             |                                                   |                                                               |                      |                                                    |                                                                                                                          |
|                  |                                           |                                                             |                                                   |                                                               |                      |                                                    |                                                                                                                          |
| <b>Core ID:</b>  | LIWA/66                                   |                                                             |                                                   |                                                               |                      |                                                    |                                                                                                                          |
|                  |                                           |                                                             |                                                   |                                                               |                      |                                                    |                                                                                                                          |
| <b>Depth (m)</b> | <b>Munsell Colour</b>                     | <b>Texture</b>                                              | <b>Induration/<br/>sorting</b>                    | <b>Bedding structures</b>                                     | <b>HCl reaction*</b> | <b>Inferred depositional<br/>environment</b>       | <b>Additional comments</b>                                                                                               |
| 50               | 5 YR 5/6 yellowish red                    | loose medium sand                                           | weak/loose                                        |                                                               | delayed x            | eolian                                             |                                                                                                                          |

| 52        | 5 YR 5/6 yellowish red                      | medium silty sand                 | loose                             | very fine laminae of fine sand<br>pale sand with tabular and-<br>sized red sand | x             | eolian                               | Data Repository item 2005194                                                                                                      |
|-----------|---------------------------------------------|-----------------------------------|-----------------------------------|---------------------------------------------------------------------------------|---------------|--------------------------------------|-----------------------------------------------------------------------------------------------------------------------------------|
| 55        | 5 YR 5/6 yellowish red                      | medium silty sand                 | quite loose                       | laminae                                                                         | x             | eolian                               |                                                                                                                                   |
| 60        | 5 YR 5/6 yellowish red                      | medium silty sand                 | loose                             | laminae                                                                         | xx            | eolian                               |                                                                                                                                   |
| 65        | 5 YR 5/4 reddish brown                      | medium sand                       | loose                             | none visible                                                                    | x             | eolian                               |                                                                                                                                   |
| 70        | 5 YR 5/4 reddish brown                      | medium sand                       | loose                             | none visible                                                                    | xx            | eolian                               |                                                                                                                                   |
| 73.5      | 10 YR 7/2 light grey                        | fine silt                         | quite hard                        | none visible                                                                    | instant xx    | fluvio-lacustrine (wadi?)            | boundary between red sand and pale silty<br>deposition at 73.5m, possible horizontal<br>bioturbation - red tracks on core surface |
| 75        | 10 YR 7/2 light grey                        | fine silt                         | quite hard                        | none visible                                                                    | instant xx    | fluvio-lacustrine (wadi?)            |                                                                                                                                   |
| 80        | 7.5 YR 6/4 light brown                      | medium sand to fine silt          | loose                             | none visible                                                                    | instant xx    | fluvio-lacustrine (wadi?)            |                                                                                                                                   |
| 85        | 5 YR 5/8 yellowish red                      | medium sand to fine silt          | very loose                        | fine pale/red laminae                                                           | x             | eolian                               |                                                                                                                                   |
| 90        | 5 YR 5/8 yellowish red                      | medium sand to fine silt          | loose                             | none visible                                                                    | xx            | eolian                               |                                                                                                                                   |
| 92        | 10 YR 8/3 very pale<br>brown                | fine silt                         | quite hard                        | none visible                                                                    | x             | eolian                               | looks like other silt samples which gave xx HCl<br>reaction.                                                                      |
| 95        | 10 YR 8/3 very pale<br>brown                | fine silt                         | quite hard                        | none visible                                                                    | xx            | eolian                               |                                                                                                                                   |
| 100       | 7.5 YR 7/3 pink                             | medium sand                       | loose                             | none visible                                                                    | xx            | fluvio-lacustrine (wadi?)            |                                                                                                                                   |
| 105       | 7.5 YR 6/4 light brown                      | medium sand                       | very loose and<br>crumbly         | fine pale/red laminae                                                           | o             | eolian                               |                                                                                                                                   |
| 108       | 2.5 Y 8/1 white                             | silty                             | hard                              | none visible                                                                    | instant xx    | fluvio-lacustrine (wadi?)            | very rapid transition from crumbly red to silty pale<br>107-108m                                                                  |
| 110       | 2.5 Y 8/1 white                             | silty                             | hard                              | none visible                                                                    | instant xx    | fluvio-lacustrine (wadi?)            |                                                                                                                                   |
| 115       | 10 YR 7/2 light grey                        | fine silty sand                   | hard, brittle to fairly<br>soft   | none visible                                                                    | xx            | fluvio-lacustrine (wadi?)            |                                                                                                                                   |
| 120       | 10 YR 7/2 light grey                        | fine sand                         | quite soft                        | none visible                                                                    | x             | fluvio-lacustrine (wadi?)            |                                                                                                                                   |
| 125       | 10 YR 7/2 light grey                        | fine sand and clay                | brittle and soft                  | none                                                                            | xx            | fluvio-lacustrine (wadi?)            |                                                                                                                                   |
| 137       | 10 YR 7/2 light grey with<br>2.5 YR 5/8 red | fine sand and clay                | hard                              | grey mottled with pale and dark<br>red patches                                  | o             | fluvio-lacustrine (wadi?)            |                                                                                                                                   |
| 151       | 10 YR 8/1 white                             | medium and fine sand,<br>and clay | brittle                           | conglomerate, none visible                                                      | xx            | fluvio-lacustrine (wadi?)            | risotto rock, mottled with some red                                                                                               |
| 157.5     | 2.5 YR 5/8 red                              | fine sand and clay                | soft and brittle                  | few randomly spaced very fine<br>laminae <1mm                                   | x             | fluvio-lacustrine (wadi?)            | very sudden change to this much darker red at<br>157, from pale silty sediment.                                                   |
|           |                                             |                                   |                                   |                                                                                 |               |                                      |                                                                                                                                   |
|           |                                             |                                   |                                   |                                                                                 |               |                                      |                                                                                                                                   |
| Core ID:  | LIWA/70                                     |                                   |                                   |                                                                                 |               |                                      |                                                                                                                                   |
|           |                                             |                                   |                                   |                                                                                 |               |                                      |                                                                                                                                   |
| Depth (m) | Munsell Colour                              | Texture                           | Induration/<br>sorting            | Bedding structures                                                              | HCl reaction* | Inferred depositional<br>environment | Additional comments                                                                                                               |
| 43        | 10 YR 7/2 light grey                        | fine to medium sand               | weak-medium<br>bound, well sorted | none visible                                                                    | instant xx    | eolian                               | dense - no macropores                                                                                                             |
| 55        | reddish brown                               | fine to medium sand               | loose                             |                                                                                 | delayed xx    | eolian                               |                                                                                                                                   |
| 60        | light grey                                  | fine sand                         | loose                             |                                                                                 | xx            | eolian                               |                                                                                                                                   |
| 62        | reddish brown                               | medium sand                       | very loose                        | none                                                                            | o             | eolian                               |                                                                                                                                   |
| 70        | reddish brown                               | fine to medium sand               | loose                             |                                                                                 | xx            | eolian                               |                                                                                                                                   |
| 75        | reddish brown                               | fine to medium sand, some<br>silt | loose                             |                                                                                 | xx            | eolian                               |                                                                                                                                   |
| 80        | reddish brown                               | fine to medium sand, some<br>silt | loose                             |                                                                                 | xx            | eolian                               |                                                                                                                                   |
| 85        | 10 YR 7/2 light grey                        | fine silty sand                   | hard, well sorted                 | none visible                                                                    | xx            | eolian                               |                                                                                                                                   |
| 95        | reddish brown                               | fine to medium sand               | loose                             |                                                                                 | xx            | eolian                               |                                                                                                                                   |
| 100       | reddish brown                               | fine to medium sand               | loose                             |                                                                                 | xx            | eolian                               |                                                                                                                                   |
| 105       | greenish grey                               | fine silty sand                   | loose                             |                                                                                 | xx            | eolian                               |                                                                                                                                   |
| 110       | reddish brown                               | fine to medium sand, some<br>silt | loose                             |                                                                                 | xx            | eolian                               |                                                                                                                                   |
| 111       | 10 YR 7/2 light grey                        | fine silty sand                   | strong, well sorted               | none                                                                            | xx            | eolian                               |                                                                                                                                   |

| 119                      | 10 YR 7/3 very pale brown                                                           | fine silty sand                                                                 | hard, well sorted                              | none                                                                                                           | Table DR1             | xx                                                         | eolian                                                                                                             | Data Repository item 2005194 |
|--------------------------|-------------------------------------------------------------------------------------|---------------------------------------------------------------------------------|------------------------------------------------|----------------------------------------------------------------------------------------------------------------|-----------------------|------------------------------------------------------------|--------------------------------------------------------------------------------------------------------------------|------------------------------|
| 125                      | 7.5 Y 8/2 pale yellow                                                               | fine silty sand                                                                 | hard                                           | none visible                                                                                                   |                       | o                                                          | eolian                                                                                                             |                              |
| 140                      | 2.5 Y 7/3 pale yellow                                                               | fine silty sand                                                                 | very hard                                      | none visible                                                                                                   |                       | xx                                                         | eolian                                                                                                             |                              |
| 152                      | 7.5 R 8/1                                                                           | conglomerate risotto rock, fine silty sand                                      | very hard                                      | none visible                                                                                                   |                       | xx                                                         | eolian                                                                                                             |                              |
|                          |                                                                                     |                                                                                 |                                                |                                                                                                                |                       |                                                            |                                                                                                                    |                              |
|                          |                                                                                     |                                                                                 |                                                |                                                                                                                |                       |                                                            |                                                                                                                    |                              |
|                          |                                                                                     |                                                                                 |                                                |                                                                                                                |                       |                                                            |                                                                                                                    |                              |
| Core ID:                 | LIWA/166                                                                            |                                                                                 |                                                |                                                                                                                |                       |                                                            |                                                                                                                    |                              |
|                          |                                                                                     |                                                                                 |                                                |                                                                                                                |                       |                                                            |                                                                                                                    |                              |
| Depth (m)                | Munsell Colour                                                                      | Texture                                                                         | Induration/<br>sorting                         | Bedding structures                                                                                             | HCl reaction*         | Inferred depositional environment                          | Additional comments                                                                                                |                              |
| 0-44                     | 5YR5/8 yellowish red                                                                | fine sand                                                                       | very well sorted                               | no preservation of primary sedimentary structures                                                              | weak                  | eolian                                                     |                                                                                                                    |                              |
| 44-45                    | 5YR5/8 yellowish red                                                                | fine sand                                                                       | very well sorted                               | zone of preservation of steeply dipping trough stratified laminations                                          | weak                  | eolian                                                     |                                                                                                                    |                              |
| 45-61                    | change from 5YR5/8 to 5YR6/6                                                        | fine sand                                                                       | very well sorted                               | no preservation                                                                                                | none to 59m, x 60-61m | eolian                                                     | core extremely disturbed                                                                                           |                              |
| 61-62                    | 10YR7/2 light grey                                                                  | fine silty sand                                                                 | very well sorted                               | none obvious                                                                                                   | very xx               | interdune                                                  | key interdune (#1)                                                                                                 |                              |
| 62-67                    | 7.5YR6/4 light brown                                                                | sand                                                                            | well sorted                                    |                                                                                                                | o                     | eolian                                                     | extensive development of fine 1-2mm laminations generally continuous and ? Bimodal (coarse/fine)                   |                              |
| 67-77                    | 10YR6/4 light yellowish brown                                                       | sandy silt                                                                      |                                                | none                                                                                                           | x-xx                  | interdune-like                                             | interdune #2 start                                                                                                 |                              |
| 74-80 (nb overlap above) | top 10YR8/1 grades @ 79m to 10YR6/3 pale brown to 80m 10YR6/4 light yellowish brown | silty? Slightly sandy silt. Grades downwards and incr in carbonate content      |                                                | wavy non-parallel laminations contorted bedding - poss disturbed by salt crystallisation heave - mass movement |                       | inland sabkha                                              | marl with abundant carbonate up to 100% in places. Distinct upper contact at 74/5m                                 |                              |
|                          |                                                                                     |                                                                                 |                                                |                                                                                                                |                       |                                                            |                                                                                                                    |                              |
| 80-82 distinct contact   | 5YR5/6 yellowish red                                                                | sand                                                                            | bimodal (well sorted lamination by lamination) | laminated                                                                                                      | o-x very slight       | eolian                                                     | distinct contact with above                                                                                        |                              |
| 82-93                    | 10YR7/4-10YR7/2 yellow to light grey                                                | fine silty sand and fine sand                                                   | very well sorted                               | none                                                                                                           | x-xx                  | wadi/aeolian sand infl by post-dep carbonate precipitation |                                                                                                                    |                              |
| 94-100                   | 10YR6/2 light brownish grey                                                         | fine sand                                                                       | very well sorted                               | none                                                                                                           | x-xx                  | post-depositionally modified eolian sand                   | core reformed - didn't stay in barrel                                                                              |                              |
| 100-120.5                | incl 10YR6/2 light brownish grey, 7/2 light grey, 8/1 white                         | carbonate rich sands, silts and scarce conglomerates (intraformational pebbles) |                                                | interbedded sands/silts/conglom                                                                                | x-xx                  | fluvio-lacustrine complex poss wadi                        | Lacustrine with intraformational pebbles.                                                                          |                              |
| 120.5-128                | 10YR6/3-6/4 pale brown - light yellowish brown                                      | calcareous fine sand, limited silt content                                      | well sorted                                    | none obvious. Iron stained trough cross beds @ 122m                                                            |                       | eolian sand modified by postdep processes                  | core did not stay in barrel                                                                                        |                              |
| 128-131.3                | 10YR8/1                                                                             | silt. Scarce iron staining                                                      |                                                | massive                                                                                                        | very xx               | lacustrine, slack water deposit                            | marl. Distinct fine silt                                                                                           |                              |
| 131.3-137                | 10R6/4 pale red                                                                     | fine sand                                                                       | well sorted                                    | none                                                                                                           | x-xx                  |                                                            | dull red. Mottled - extensive - past bioturbation. Calcareous.                                                     |                              |
| 137-138                  | 10YR7/3                                                                             | highly calcareous sandy silt                                                    |                                                |                                                                                                                | very xx               | interdune                                                  | core complete (continuous metre - much cabonate)                                                                   |                              |
| 138-142.5                | 5YR5/8 yellowish red                                                                | fine sand                                                                       | very well sorted                               | clear laminations                                                                                              | x                     | eolian                                                     |                                                                                                                    |                              |
| 142-155.5                | 10R6/4 pale red mixed w 10R8/2 pinkish white, 10R8/1 white                          | sandy silt and silt                                                             |                                                |                                                                                                                | o-x very slight       | interdune/lacustrine deposit                               | bioturbated                                                                                                        |                              |
| 155.5-159                | 2.5YR5/8 red                                                                        | sand                                                                            | very well sorted                               | extensive preservation of trough cross-bedding esp at base                                                     | o                     | eolian                                                     | highly cemented, esp towards base. Anhydrite and contact - base dessication - pan evaporatoin surface at dune base |                              |
| 160-163                  | 7.5YR5/4                                                                            | sand                                                                            |                                                |                                                                                                                |                       | eolian sand with extensive post-dep modification           | varying anhydrite conditions                                                                                       |                              |
|                          |                                                                                     |                                                                                 |                                                |                                                                                                                |                       |                                                            |                                                                                                                    |                              |
|                          |                                                                                     |                                                                                 |                                                |                                                                                                                |                       |                                                            |                                                                                                                    |                              |

| Core ID:    | LIWA/172                           |                                                                                                   |                                    |                                                                 |                         |                                                  |                                                                                                                                             |
|-------------|------------------------------------|---------------------------------------------------------------------------------------------------|------------------------------------|-----------------------------------------------------------------|-------------------------|--------------------------------------------------|---------------------------------------------------------------------------------------------------------------------------------------------|
|             |                                    |                                                                                                   |                                    | Table DR1                                                       |                         |                                                  | Data Repository item 2005194                                                                                                                |
| Depth (m)   | Munsell Colour                     | Texture                                                                                           | Induration/<br>sorting             | Bedding structures                                              | HCl reaction*           | Inferred depositional<br>environment             | Additional comments                                                                                                                         |
| 0-54        | 5YR5/8                             | fine sand                                                                                         | very well sorted                   |                                                                 | o                       | eolian                                           | mostly disturbed by drilling, but blocks poss 50-54m, indic steeply dipping x-bedding w. bimodal well sorted grain size between laminations |
| 54-55       | 5YR8/1 white                       | fine sand                                                                                         | well sorted                        |                                                                 | xx                      | interdune                                        | carbonate content. Distinct contacts top and bottom                                                                                         |
| 55-56       | 5YR5/8                             | fine sand                                                                                         | very well sorted                   |                                                                 | o                       | eolian                                           |                                                                                                                                             |
| 57-58       | 5YR7/1                             | fine sand                                                                                         | very well sorted                   |                                                                 | v xx rapid              | interdune                                        |                                                                                                                                             |
| 58-59.5     | 5YR5/8                             | sand                                                                                              | well sorted                        | laminated                                                       |                         | eolian                                           |                                                                                                                                             |
| 59.5-60     | 10YR7/3                            | fine sand                                                                                         | very well sorted                   |                                                                 | x-xx                    | interdune                                        | scarce iron staining                                                                                                                        |
| 60-72.5     | 5YR5/8 and 4/6                     | fine sand                                                                                         | well sorted, slightly cemented     | well expressed laminations                                      | slight                  | eolian                                           |                                                                                                                                             |
| 72.5-76     | 10YR6/3                            | sandy silt                                                                                        | very well sorted                   | no obvious primary sedimentary structures                       | v xx rapid              | ?loess dune/interdune with large fines content   | really high silt content                                                                                                                    |
| 76-76.7     | 5YR4/6 yellowish red               | sand                                                                                              | very well sorted                   | laminated bimodally. Distributed grain size between laminations |                         | eolian                                           |                                                                                                                                             |
| 76.7-86     | 10YR5/3                            | sandy silt                                                                                        | very well sorted                   | no obvious (scarce laminations?)                                | xx                      | loess? Aeolian/interdune with post-dep mod       | carbonate near surface (post-depositional modification)                                                                                     |
| 87-89.7     | 2.5Y7/2-6/3                        | sandy silt to silty sand (very fine)                                                              | friable. Very well sorted          |                                                                 | xx                      | interdune                                        |                                                                                                                                             |
| 89.7-91.8   | 5YR5/4                             | very fine sand, some silt content in places                                                       | very well sorted                   | none obvious. Scarce mottling                                   | x-xx                    | eolian                                           |                                                                                                                                             |
| 91.8-97     | 10YR8/1 to 7/2 white to light grey | silt (v limited sand content). Vv fine                                                            |                                    | none obvious.                                                   | high xx                 | standing water/playa/interdune                   | polygonal cracking - very fine                                                                                                              |
| 97-102.5    | 10YR8/1 to 7/2 white to light grey | fine sand, minor medium sand                                                                      | well sorted                        |                                                                 | limited - strange!      | inferred wadi deposits                           | sandy compared to 91.8-97, which is silty.                                                                                                  |
| 102.5-113   | 10YR7/3, 7/1, 8/1                  | mixed sandy conglomerate and sand, pebbles geneerally react with acis, sandy matrix less reactive | sand very well sorted and bleached | none obvious, except scarce bedding assoc with pabble layers    |                         | wadi/fluviodeltaic complex                       |                                                                                                                                             |
| 113-116     | 2.5YR5/8 red                       | fine sand                                                                                         | very well sorted                   | some mottling                                                   | x                       | eolian                                           |                                                                                                                                             |
| 116-119     | 7.5YR6/4 down core to 2.5YR7/3     | sand                                                                                              | poorly sorted                      | coarse and fine cross beds. Dominant fine sad grain size        | x-xx                    | inferred wadi deposits                           | distinct upper contact. Lower contact more gradational. The 2.5YR7/3 sed is better sorted (like a dune with no coarse grain laminations)    |
| 119-119.5   | 10YR7/2                            | silt. No sand content                                                                             |                                    | none                                                            | limited to x (?delayed) | distinctive slack water deposit                  | grades downwards to next unit                                                                                                               |
| 119.5-120.5 | 2.5YR6/3                           | silty sand                                                                                        | v friable                          | none obvious                                                    | xx                      | ?interdune sand grading upwards into playa       |                                                                                                                                             |
| 120.5-121.5 | 10YR8/1-2.5YR7/3                   | silt                                                                                              | highly cemented                    |                                                                 | very xx some deleyed    | standing water passively sedimented unit         |                                                                                                                                             |
| 212.5-122.2 | 2.5YR5/8                           | fine sand                                                                                         | very well sorted                   | laminated small-medium scale trough cross bedding               | o-slight                | poss eolian unit with lacustrine/fluvial complex |                                                                                                                                             |
| 122.2-123   | 10YR8/1                            | silt                                                                                              | massive. Very consolidated         |                                                                 | xx                      | slack water playa deposit                        | highly calcareous. Continuous core                                                                                                          |
|             |                                    |                                                                                                   |                                    |                                                                 |                         |                                                  |                                                                                                                                             |
|             |                                    |                                                                                                   |                                    |                                                                 |                         |                                                  |                                                                                                                                             |
| Core ID:    | LIWA/322                           |                                                                                                   |                                    |                                                                 |                         |                                                  |                                                                                                                                             |
|             |                                    |                                                                                                   |                                    |                                                                 |                         |                                                  |                                                                                                                                             |
| Depth (m)   | Munsell Colour                     | Texture                                                                                           | Induration/<br>sorting             | Bedding structures                                              | HCl reaction*           | Inferred depositional<br>environment             | Additional comments                                                                                                                         |
| 0-51        | 7.5YR6/8 yellowish red             | fine sand some medium fraction                                                                    | well sorted                        |                                                                 |                         | eolian                                           |                                                                                                                                             |

| 52-53                                                                                                                                                                                                                                          | grades into 7.5R8/1-8/1<br>pinkish white downwards                                     | cemented sand                                                                            |                          | Table DR1                                                                    | xx                                | interdune/fluvio-lacustrine facies                            | Data Repository item 2005194                                                                                                                              |
|------------------------------------------------------------------------------------------------------------------------------------------------------------------------------------------------------------------------------------------------|----------------------------------------------------------------------------------------|------------------------------------------------------------------------------------------|--------------------------|------------------------------------------------------------------------------|-----------------------------------|---------------------------------------------------------------|-----------------------------------------------------------------------------------------------------------------------------------------------------------|
| 54-79                                                                                                                                                                                                                                          | 5YR5/6 yellowish red                                                                   | moist unconsolidated fine sand                                                           | very well sorted         |                                                                              |                                   | eolian                                                        | contrast to dry core descriptions, especially with respect to colour                                                                                      |
| 80-84                                                                                                                                                                                                                                          | 7.5YR7/1 light grey<br>grades down to 5YR5/8<br>ysh red                                | cemented silty sand with<br>aeolian sand fraction                                        |                          | none obvious                                                                 | grades into xx high               | eolian                                                        | carbonates decrease systematically down section. Distinct contact at top.                                                                                 |
| 85-100                                                                                                                                                                                                                                         | 5YR5/6 yellowish red                                                                   | sand                                                                                     | very well sorted         | prim strs based on core break<br>lines. low-med dip lamtd.<br>Some steep dip |                                   | eolian                                                        |                                                                                                                                                           |
| 100-108                                                                                                                                                                                                                                        | 10YR5/4 ysh brown<br>grades down to 5YR 5/6                                            | fine sand with slight silt<br>content                                                    |                          |                                                                              | xx decr to o at 108               | packet of interdune down to<br>eolian dune                    |                                                                                                                                                           |
| 110-112                                                                                                                                                                                                                                        |                                                                                        | fine silt dominated marl                                                                 |                          |                                                                              | top xx                            | fluvio-lacustrine complex                                     | grades from below                                                                                                                                         |
| 113-114                                                                                                                                                                                                                                        | 2.5Y5/3 light olive brown                                                              | calcareous sand                                                                          |                          |                                                                              |                                   | eolian                                                        |                                                                                                                                                           |
| 114-123                                                                                                                                                                                                                                        |                                                                                        | variably calcareous sand                                                                 | very well sorted         |                                                                              |                                   | inferred wadi deposits                                        |                                                                                                                                                           |
| 124-133.5                                                                                                                                                                                                                                      |                                                                                        | marl                                                                                     | well cemented            |                                                                              | xx                                | lacustrine                                                    | well preserved in drill core sections                                                                                                                     |
| within - 129-130                                                                                                                                                                                                                               | 10R5/3-4/3 weak red                                                                    | brief interval of non-<br>calcareous red sand                                            | very well sorted         |                                                                              |                                   | eolian                                                        |                                                                                                                                                           |
| 134-143                                                                                                                                                                                                                                        | 10R5/6-8/1                                                                             | variably cemented to<br>calcareous sands with silt<br>dom lenses, some up to<br>3m thick |                          |                                                                              |                                   | eolian                                                        | sand dominated                                                                                                                                            |
| 143-146.5                                                                                                                                                                                                                                      |                                                                                        | distinct marl, no sand<br>content, entirely siltstone                                    |                          | uniform - no primary sed<br>structures                                       | xx                                | lacustrine                                                    | distinct contact at 146.5m with underlying red<br>laminated sand                                                                                          |
| 146.5-161                                                                                                                                                                                                                                      | 10R5/6-8/1                                                                             | fine fluffy sand, no coarse<br>component or pebbles                                      | very well sorted         | laminations distinctly seen<br>through colour changes                        |                                   | eolian                                                        | uniformity of facies over c.10m mottles of<br>2.5YR5/8 near base and lower 7m - big pile of<br>aeolian sand with a few intercalated interdune<br>deposits |
| Positions of key marl deposits from bottom - 146-143.5, 137-128, 133.5-130, 128-110 (lacustrine with odd intercalated sandy layers), 102 (weak interdune), 76-78 (interdune grading downwards), 58 (v. weak interdune), 51 (v weak interdune). |                                                                                        |                                                                                          |                          |                                                                              |                                   |                                                               |                                                                                                                                                           |
|                                                                                                                                                                                                                                                |                                                                                        |                                                                                          |                          |                                                                              |                                   |                                                               |                                                                                                                                                           |
|                                                                                                                                                                                                                                                |                                                                                        |                                                                                          |                          |                                                                              |                                   |                                                               |                                                                                                                                                           |
| <b>Core ID:</b>                                                                                                                                                                                                                                | LIWA/305                                                                               |                                                                                          |                          |                                                                              |                                   |                                                               |                                                                                                                                                           |
|                                                                                                                                                                                                                                                |                                                                                        |                                                                                          |                          |                                                                              |                                   |                                                               |                                                                                                                                                           |
| Depth (m)                                                                                                                                                                                                                                      | Munsell Colour                                                                         | Texture                                                                                  | Induration/<br>sorting   | Bedding structures                                                           | HCl reaction*                     | Inferred depositional<br>environment                          | Additional comments                                                                                                                                       |
| BOXES MISSING                                                                                                                                                                                                                                  | 59-64, 69-71, 75, 77, 79, 83-85, 88, 92-93, 95, 97, 99, 103, 105-110, 113-115, 120-122 |                                                                                          |                          |                                                                              |                                   |                                                               |                                                                                                                                                           |
| EMPTY BOXES                                                                                                                                                                                                                                    | 161-168, 155, 150, 146, 137, 112                                                       |                                                                                          |                          |                                                                              |                                   |                                                               |                                                                                                                                                           |
| 46-67                                                                                                                                                                                                                                          | 10YR7/4-7/6 very pale<br>brown-yellow                                                  | fine to medium sand                                                                      | well sorted              | obliterated, small laminations<br>visible in places                          | variable o-xx                     | eolian                                                        | not properly cored                                                                                                                                        |
| 68-104                                                                                                                                                                                                                                         | 7.5YR6/6-6/8 reddish<br>yellow                                                         | fine sand                                                                                | well sorted              | small pale/dark 1mm<br>laminations, dark & coarser<br>grained.               | x                                 | eolian                                                        | variable degree of lamination, dipping steeply.                                                                                                           |
| 111                                                                                                                                                                                                                                            | 7.5YR8/4-8/6 pink-<br>reddish yellow                                                   | silty sand                                                                               | well sorted              | none visible                                                                 | xx                                | inferred start of interdune                                   |                                                                                                                                                           |
| 115-119                                                                                                                                                                                                                                        | 7.5YR6/6-6/8 reddish<br>yellow                                                         | fine sand coarsening at<br>base, and increasingly<br>calcareous                          | well sorted              | same laminations at 117m,<br>otherwise none.                                 | o-xx thru dune section<br>downwds | eolian                                                        |                                                                                                                                                           |
| 123-136                                                                                                                                                                                                                                        | 2.5Y8/1-8/2 white - pale<br>yellow                                                     | silty sand, becoming sandy<br>silt at 129m, increasingncr<br>grain size through core     | well sorted              | none                                                                         | xx-o down core                    | thick white interdune (lacust?)<br>marl to reworked dune sand |                                                                                                                                                           |
| 136                                                                                                                                                                                                                                            | 2.5Y8/1 white                                                                          | fine sand 'risotto' texture,<br>rip up clasts                                            | medium to well<br>sorted | none                                                                         | xx                                | inferred wadi deposits                                        | mottled slightly darker pink in chunks, carbonate<br>nodules.                                                                                             |
| 138-140                                                                                                                                                                                                                                        | 5Y8/1 white                                                                            | sil, possibly with some clay<br>(cracking)                                               | well sorted              | none                                                                         | o/x to xx down core               | fluvio/lacustrine                                             | looks identical but v weak HCl reaction 138-9 and<br>strong 139-40                                                                                        |
| 140-141.5                                                                                                                                                                                                                                      | mottling*                                                                              | risotto texture', pebble size<br>decreases down core                                     | well sorted              | none                                                                         | x                                 | inferred wadi deposits                                        |                                                                                                                                                           |

|                    |                                                                              |                                                                  |               |                                |                         |                           |                                                                                                                      |
|--------------------|------------------------------------------------------------------------------|------------------------------------------------------------------|---------------|--------------------------------|-------------------------|---------------------------|----------------------------------------------------------------------------------------------------------------------|
| 141.5-149          | as above down to 10YR8/2-7/2 very pale brown - light grey                    | fine sand                                                        | well sorted   | none (obliterated?)            | x throughout            | eolian                    | decreasingly mottled, increasingly sandy pinkish deposits - start of wadi/interdune/lacustrine phase                 |
| 151-159            | 5YR/81 white mottled w 5YR8/4 pint to 5YR8/1 white to 7.5YR8/2 pinkish white | clay to silty sand to fine sand downwards changing white deposit | well sorted   | none                           | variable x-xx top v xx  | start of interdune phase? | white/orange mottled clay/silt changes to pinkish sandy silt (aeolian) and paler grey fine sand (aeolian) down core. |
| 160-171            | 5YR7/3 pink to 5YR6/8 reddish yellow at base                                 | fine sand                                                        | well sorted   | some visible at top of section | o-xx variable downwards | eolian                    |                                                                                                                      |
| 166 (within above) | 5YR8/1 white and 5YR8/3 pink                                                 | risotto layer'. Thickness unsure due to core loss                | poorly sorted | none                           | x                       |                           |                                                                                                                      |



| Depth (m) | Munsell Colour                             | Texture                                                         | Induration/<br>sorting                                   | Bedding structures                                    | HCl<br>reaction*           | Inferred depositional<br>environment         | Additional comments                                                                                                |
|-----------|--------------------------------------------|-----------------------------------------------------------------|----------------------------------------------------------|-------------------------------------------------------|----------------------------|----------------------------------------------|--------------------------------------------------------------------------------------------------------------------|
| 0-102     | 5YR7/6 yellowish red                       | fine sand, medium in places                                     | very well sorted                                         | bimodal laminations                                   | o                          | eolian                                       | core not properly formed in places                                                                                 |
| 103-104   | 5YR5/6 and 6/3                             | fine and medium sand                                            | well sorted                                              | laminated                                             | x                          | interdune?                                   | 1st place core formed properly                                                                                     |
| 104-107   | 10YR8/1-10YR6/2                            | cemented fine sand                                              |                                                          | none obvious                                          | xx                         | interdune complex                            |                                                                                                                    |
| 107-112   | 7.5YR5/6 to 7/2                            | very fine sand, cemented near base                              | conglomeratic (i.e., very poorly sorted) texture at base |                                                       | variable*                  |                                              | 107 o, rest x highly calcareous                                                                                    |
| 112-114   | CORE MISSING                               |                                                                 |                                                          |                                                       |                            |                                              |                                                                                                                    |
| 114-117   | 10YR8/1-7/1 white - light grey             | calcareous cemented sand                                        |                                                          |                                                       |                            | sandy interdune, Poss some fluvial input     | 114-115 large scale gypsum crystals up to 5cm                                                                      |
| 117-118   | 2.5Y8/1 white                              | highly cemented silt - siltstone                                |                                                          | veins of ?gypsum in places                            | xx rapid                   | standing water body (interdune/lacust)       |                                                                                                                    |
| 118-120   | 10YR8/1-10YR7/2 white - light grey         | highly cemented fine sand and silts sand                        |                                                          | none                                                  | xx but delayed - dolomite? | playa/sabkha deposit                         | (dolomite)                                                                                                         |
| 120-121   | CORE MISSING                               |                                                                 |                                                          |                                                       |                            |                                              |                                                                                                                    |
| 121-130   | 2.5YR7/2 pale red                          | fine sand, highly cemented in places                            | well sorted                                              |                                                       | 126-7 (cm) x elsewhere o   | eolian                                       | strong overprinting with vadose zone processes - area > water table (saturated zone)                               |
| 131-132   | CORE MISSING                               |                                                                 |                                                          |                                                       |                            |                                              |                                                                                                                    |
| 132-134   | 2.5YR8/1 mixed with 2.5YR5/4 reddish brown | primarily cemented fine sand with in places cemented sandy silt | fine sand                                                | cross bed structures preserved                        | varied                     | highly modified dune, Poss fluvial influence |                                                                                                                    |
| 135-135.5 | 3.5YR7/1 and 2.5YR8/1                      | matrix supported by sandy conglomerate                          | rounded clasts, range of sizes                           |                                                       |                            | wadi/flood deposit                           | classic 'risotto' texture probably related to bioturbation in standing water/fluvial environment                   |
| 135.5-136 | 2.5YR5/4 mixed with 2.5YR8/1               | cemented fine sand                                              |                                                          | laminations defined by colours                        | weak                       | eolian                                       |                                                                                                                    |
| 136-147   | 2.5YR6/3                                   | cemented fine sand                                              | well sorted                                              |                                                       | variable x-xx              | dune/interdune complex                       | very thin marl (30cm) at 144/7-145m                                                                                |
| 147.9     |                                            |                                                                 |                                                          | ripple cross beds black laminations (heavy minerals). |                            |                                              | ?? At wet phase initiation overlies siltstone                                                                      |
| 148-149   | 10YR8/1 white                              | cemented silt                                                   |                                                          | none                                                  |                            | interdune/lacust capped by thin fluvial      | capped by 2.5YR8/2 - 2.5YR2.5/1 current bedded (ripples) heavy mineral laminations uncemented fine sand.           |
| 149-151.5 | 2.5YR6/4                                   | moderately cemented fine sand                                   | very well sorted                                         | scarcely laminated                                    |                            | eolian                                       |                                                                                                                    |
| 151.5-153 | 10YR7/3-10YR7/1                            | silty sand                                                      | highly cemented                                          |                                                       | very xx in places          | interdune/lacustrine                         | very extensive in situ precipitation of carbonates (calcrete nodules) downwards change in colour towards next unit |
| 153-155.5 | 2.5YR5/4 base 2.5YR7/2 top                 | highly cemented fine sand                                       | very well sorted                                         | none visible                                          | xx                         | eolian                                       | mottles 2.5YR8/1 calcrete nodules throughout                                                                       |
| 155.5-157 | 5YR8/1 mixed with 5YR7/2                   | fine sand with small medium content                             | highly cemented                                          |                                                       | rigorous                   | interdune deposit                            | highly calcareous                                                                                                  |
| 157-158   | mix of 5YR8/1, 7/2, 5/6                    | fine sand, extensive in situ chemical cementation               | highly cemented                                          |                                                       | in places xx               | inland sabkha?                               | important sabkha deposit, salty, clasts in a fine matrix                                                           |
| 158-159   | 2.5YR7/2                                   | silt, no sand fraction                                          | highly cemented                                          | none obvious, some mottling features                  | very delayed               | standing water/lacustrine/interdune/sabkha   | high dolomite concentration (delayed HCl reaction)                                                                 |
| 159-160   | 2.5YR5/8 red                               | fine sand                                                       | very well sorted                                         | none                                                  | o-x                        | eolian                                       | carbonate nodules - mottling pattern                                                                               |

| 160-164                                                                                                                                   | 10YR8/1 ad 10YR7/2                                  | sand                                                                   | extensive cementn incl discrete lenses of gypsum, zones of conc salt | Table DR2                                                                   | delayed - dolomite?          | extensive playa/sabkha basin                                        | large gypsum crystals                                                                                                                                                                                   |
|-------------------------------------------------------------------------------------------------------------------------------------------|-----------------------------------------------------|------------------------------------------------------------------------|----------------------------------------------------------------------|-----------------------------------------------------------------------------|------------------------------|---------------------------------------------------------------------|---------------------------------------------------------------------------------------------------------------------------------------------------------------------------------------------------------|
| 164-166                                                                                                                                   | 2.5YR5/4-5/6                                        | fine sand                                                              | very well sorted                                                     |                                                                             |                              | eolian                                                              | carbonate nodules and other mottles throughout                                                                                                                                                          |
| 166-168                                                                                                                                   | 2.5Y7.2 light grey                                  | silt                                                                   | highly cemented                                                      |                                                                             |                              | slackwater playa/sabkha deposit                                     | extensive veins of gypsum (up to 5cm thick)<br>vertical stretch>30cm (tee pee structures?)                                                                                                              |
| 168-169                                                                                                                                   | 10R5/6 red                                          | sand                                                                   | very well sorted, cemented                                           | presvn ripple lamins + xbeds (planar +trough) enhanced by post-dep iron ppn |                              | eolian                                                              |                                                                                                                                                                                                         |
| Section continues into sequence of highly cemented calcareous and non-calcareous siltstone of considerable antiquity (?miocene or older?) |                                                     |                                                                        |                                                                      |                                                                             |                              |                                                                     |                                                                                                                                                                                                         |
| <b>Core ID:</b>                                                                                                                           | LIWA/47                                             |                                                                        |                                                                      |                                                                             |                              |                                                                     |                                                                                                                                                                                                         |
| Depth (m)                                                                                                                                 | Munsell Colour                                      | Texture                                                                | Induration/sorting                                                   | Bedding structures                                                          | HCl reaction*                | Inferred depositional environment                                   | Additional comments                                                                                                                                                                                     |
| 0-30                                                                                                                                      | 7.5YR7/6 reddish yellow                             | fine sand (70-90 um)                                                   | well sorted                                                          | obliterated                                                                 | scarce carb x                | eolian                                                              |                                                                                                                                                                                                         |
| 31-48                                                                                                                                     | 7.5YR6/6 reddish yellow                             | partially cemented fine sand                                           | well sorted                                                          | obliterated                                                                 | xx                           | eolian                                                              | carbonate nodules up to 5mm diameter (concentration increases with depth), same sand being overmapped with carbonate                                                                                    |
| 49-54                                                                                                                                     | mottling 7.5YR5/6 and 7.5YR6/3 and 7.5YR8/2 and 8/1 | fine sand                                                              | well sorted                                                          | obliterated                                                                 | instant xx, high cementation | eolian with post-dep carbonate                                      | similar features. Incr carbonate content and cementation progressively                                                                                                                                  |
| 55                                                                                                                                        | CORE MISSING                                        |                                                                        |                                                                      |                                                                             |                              |                                                                     |                                                                                                                                                                                                         |
| 55-56                                                                                                                                     | 7.5YR8/1                                            | bleached fine sand                                                     | very very wel sorted                                                 | some fine laminations and small scale cross-bedding                         | o                            | eolian-fluvial interface                                            | Big change, uniform sand                                                                                                                                                                                |
| 56-57                                                                                                                                     | 7.5YR8/1                                            | claystone/siltstone, marl.                                             | massive                                                              |                                                                             | o-x                          | slack water lake deposit                                            | uniform but scarce iron staining, pure clay                                                                                                                                                             |
| 57-58                                                                                                                                     |                                                     |                                                                        |                                                                      |                                                                             |                              |                                                                     | sandy clay                                                                                                                                                                                              |
| 58-61                                                                                                                                     | 10R7/4 pale red and 10R8/1 white                    | cemented sand and silt (silty sand), silt content decreases with depth |                                                                      |                                                                             |                              | fluvio-lacustrine, and inferred wadi deposits                       | extensively mottled and bioturbated. Scarece iron staining.                                                                                                                                             |
| 62-77                                                                                                                                     | 5YR7/2                                              | sandy silt grading down to silty sand                                  | very well sorted fine sand                                           | none obvious. Fining upwards sequence of rip up clasts                      | weak (x)                     | fluvio-lacust                                                       | silt domination in upper 2-3m. Sand dominant rest. Scarce carbonate nodules                                                                                                                             |
| 66-67                                                                                                                                     |                                                     | conglomerate ('risotto' texture indicative of carbonate rip up clasts) |                                                                      |                                                                             |                              | fluvio-lacust                                                       |                                                                                                                                                                                                         |
| nr 77                                                                                                                                     | back to 10R7/3                                      |                                                                        |                                                                      |                                                                             |                              |                                                                     |                                                                                                                                                                                                         |
| 77-78                                                                                                                                     | CORE MISSING                                        |                                                                        |                                                                      |                                                                             |                              |                                                                     |                                                                                                                                                                                                         |
| 78-88                                                                                                                                     | 10R7/3 w varying concs of 10R8/1                    | very fine sand                                                         | very well sorted                                                     | low angle fine (heavy minerals in places)                                   | xx-x                         | eolian                                                              | iron staining at base (88m), red colour - very fine well sorted texture with laminations, iron mottles 5-10% in olaces                                                                                  |
| 88-90                                                                                                                                     | 5YR5/6 yellowish red                                | fine to medium sand                                                    | well sorted                                                          | laminated (1-5mm), sub-horizontally bedded                                  | o                            | eolian-fluvial                                                      | lamination clearly indicated by iron staining                                                                                                                                                           |
| 90-98.5                                                                                                                                   | 10YR8/1 dominant                                    |                                                                        |                                                                      |                                                                             |                              |                                                                     | extensive mottles of 10YR7/1 and 10YR7/3. Some discrete carbonate nodules                                                                                                                               |
| 98.5-101.5                                                                                                                                |                                                     | fine sand especially towards base                                      | well sorted, with worm burrowings                                    |                                                                             | x                            | base eolian, grading up to water-saturated fluvio-lacustrine facies | iron stained mottling, downwards gradation from 10R8/1 to 7/1 sand to 10R5/8 sand, concomitant decrease in carbonate and mottling, base - contact boundary on 2.5YR5/6 possible liquefaction structures |

| 101.5-116 | 10R8/1 in places<br>10R7/11                     | marl, fines dominated (silt, clay)                          | massive and well sorted                           | weak horizontal laminations in places                            | weak in places        | fluvio-lacustrine                                  | concentration of gypsum bands at 105, 106, 109.7, thru 115-116, first sign of massive gypsum in core                                       |
|-----------|-------------------------------------------------|-------------------------------------------------------------|---------------------------------------------------|------------------------------------------------------------------|-----------------------|----------------------------------------------------|--------------------------------------------------------------------------------------------------------------------------------------------|
| 116-117.5 | CORE MISSING                                    |                                                             |                                                   |                                                                  |                       |                                                    |                                                                                                                                            |
| 117.5-131 | notably different from above - grades down from | marl, clayey silt and silty clay                            |                                                   | scarce secondary bioturbation structures, chaotic gypsum bedding | o                     | subaerially exposed evaporative lake               | incr conc and thickness of gypsum banding (some bands >10cm and cont thru core), potentially important layer for correlation between cores |
|           | 10R8/1, 7/1 to 10R5/6                           |                                                             |                                                   |                                                                  |                       |                                                    |                                                                                                                                            |
| 131-      | from 7.5YR5/1 to 7.5YR 5/4                      | consolidated (cemented) mudstones                           |                                                   |                                                                  | variable xx to x to o |                                                    | widespread mottling, gypsum in variable concentrations throughout, very fine laminations (1-2mm) in places                                 |
|           |                                                 |                                                             |                                                   |                                                                  |                       |                                                    |                                                                                                                                            |
|           |                                                 |                                                             |                                                   |                                                                  |                       |                                                    |                                                                                                                                            |
|           |                                                 |                                                             |                                                   |                                                                  |                       |                                                    |                                                                                                                                            |
| Core ID:  | LIWA/48                                         |                                                             |                                                   |                                                                  |                       |                                                    |                                                                                                                                            |
|           |                                                 |                                                             |                                                   |                                                                  |                       |                                                    |                                                                                                                                            |
| Depth (m) | Munsell Colour                                  | Texture                                                     | Induration/sorting                                | Bedding structures                                               | HCl reaction*         | Inferred depositional environment                  | Additional comments                                                                                                                        |
| 8-9       | 7.5YR6/6                                        | consolidated silty fine sand                                | very well sorted                                  | not visible                                                      | xx                    | eolian                                             | possible overprint of pluvial activity                                                                                                     |
| 9-12      | 5YR5/6                                          | finse sand consolidated                                     | very well sorted                                  |                                                                  | not much reaction     | dry conds. Landscape stability (roses on surface). | must post-dep modification and cementation, abundant precipitated(?) gypsum (sand roses), desert roses of gypsum present                   |
| 12-17     | downwards gradation 7.5YR6/2 to 5YR4/6          | fine sand                                                   |                                                   | well bedded (fine laminations steeply dipping up to 15 deg)      | upper xx lower o      | eolian                                             | downwards gradation light to dark and carbonate to non-carbonate                                                                           |
| 17-20.5   | 7.5YR6/6                                        | consolidated fine sand and silt                             |                                                   | no obvious primary structures                                    | xx                    | interdune?                                         |                                                                                                                                            |
| 20.5-21   | 5YR4/6                                          | aeolian sand slightly coarser grain size than above + below |                                                   | well bedded finely laminated                                     | o-x                   |                                                    |                                                                                                                                            |
| 21-23     | 5YR6/6-5/6                                      |                                                             |                                                   | very finely horizontal laminated                                 | x                     | interdune - sand and silt laminated                | some mottling/bioturbation                                                                                                                 |
| 23-37.7   |                                                 | very consolidated fine sand                                 | very well sorted                                  | no primary sedimentary structures                                | xx                    | eolian                                             |                                                                                                                                            |
| 37.7-46.5 | 10YR8/1-10YR8/2                                 | mixed sands and fines, cemented                             |                                                   | none obvious                                                     | xx                    | fluvio-lacust (wadi?)                              | very continuous coring stops sharply (due to less carbonate?) @ 46m, less consolidated                                                     |
| 46.5-51   | 10R8/3-10R7/2                                   | light pink sands, clean sands - no fines content            | very well sorted                                  | none                                                             | x                     | eolian                                             |                                                                                                                                            |
| 51-53     | 10R8/2-8/1                                      | risotto 'conglomerate'                                      |                                                   | carbonate granules                                               | xx                    | inferred wadi deposits                             |                                                                                                                                            |
| 53-54     | 10R7/2                                          | consolidated sand                                           | well sorted                                       | structureless                                                    |                       | eolian possibly fluvio-lacustrine                  |                                                                                                                                            |
| 54-58     | 10R6/1 to 10R6/4 w depth                        | sand                                                        | well sorted                                       | weakly bedded in places                                          | xx                    | fluvio-lacustrine                                  | maybe subaerial due to red colour                                                                                                          |
| 58-63     | 5YR8/1                                          | highly cemented sand, high carbonate content                |                                                   | structureless                                                    | xx                    | fluvio-lacustrine                                  | scarce mottling <5%                                                                                                                        |
| 63-66     | 10R8/1-10R6/3                                   | less consolidated than above sands                          | well sorted. Better cemented pebble concs at base | laminated (defined by heavy minerals*)                           |                       |                                                    | * some dip by up to 12 deg in cross-bedding pattern, pebble-like rip up clasts present                                                     |
| 66-67     | CORE MISSING                                    |                                                             |                                                   |                                                                  |                       |                                                    |                                                                                                                                            |
| 67-70     | 10R5/4 to 2.5 YR 5/6                            | semi- to consolidated fine sand                             | very well sorted                                  |                                                                  |                       | eolian                                             | iron staining in central metre, mottling <10% throughout.                                                                                  |
| 70-74     | CORE MISSING                                    |                                                             |                                                   |                                                                  |                       |                                                    |                                                                                                                                            |

| 74-85     | 10R8/1                                                    | highly cemented marl, pure claystone, 77-9 marl      |                              | Table DR2                                                                | x-xx          | lacustrine/fluvial deposit (primarily lacustrine) | gypsum traces <5% bottom zone                                                                                               |
|-----------|-----------------------------------------------------------|------------------------------------------------------|------------------------------|--------------------------------------------------------------------------|---------------|---------------------------------------------------|-----------------------------------------------------------------------------------------------------------------------------|
| 85-87     | All as above with greater concentration of gypsum present |                                                      |                              |                                                                          |               |                                                   |                                                                                                                             |
| 87-95     | 10R8/1 to 10R7/8 and scarce 10R5/6                        | gypsum-rich v. fine grained (marl) with red staining |                              |                                                                          |               | lacust (?evaporite lake)                          | concentrated anhydrite band 94m                                                                                             |
| 95-104    | 10R8/1 to 10R7/3                                          | evaporite v. fine grained vv cemented                |                              | none obvious. Obliterated by evaporite ppn (predom anhydrite)            |               |                                                   |                                                                                                                             |
|           |                                                           |                                                      |                              |                                                                          |               |                                                   |                                                                                                                             |
|           |                                                           |                                                      |                              |                                                                          |               |                                                   |                                                                                                                             |
|           |                                                           |                                                      |                              |                                                                          |               |                                                   |                                                                                                                             |
| Core ID:  | LIWA/66                                                   |                                                      |                              |                                                                          |               |                                                   |                                                                                                                             |
|           |                                                           |                                                      |                              |                                                                          |               |                                                   |                                                                                                                             |
| Depth (m) | Munsell Colour                                            | Texture                                              | Induration/sorting           | Bedding structures                                                       | HCl reaction* | Inferred depositional environment                 | Additional comments                                                                                                         |
| 50        | 5 YR 5/6 yellowish red                                    | loose medium sand                                    | weak/loose                   |                                                                          | delayed x     | eolian                                            |                                                                                                                             |
| 52        | 5 YR 5/6 yellowish red                                    | medium silty sand                                    | loose                        | very fine laminae of fine sand pale sand with medium sand-sized red sand | x             | eolian                                            |                                                                                                                             |
| 55        | 5 YR 5/6 yellowish red                                    | medium silty sand                                    | quite loose                  | laminae                                                                  | x             | eolian                                            |                                                                                                                             |
| 60        | 5 YR 5/6 yellowish red                                    | medium silty sand                                    | loose                        | laminae                                                                  | xx            | eolian                                            |                                                                                                                             |
| 65        | 5 YR 5/4 reddish brown                                    | medium sand                                          | loose                        | none visible                                                             | x             | eolian                                            |                                                                                                                             |
| 70        | 5 YR 5/4 reddish brown                                    | medium sand                                          | loose                        | none visible                                                             | xx            | eolian                                            |                                                                                                                             |
| 73.5      | 10 YR 7/2 light grey                                      | fine silt                                            | quite hard                   | none visible                                                             | instant xx    | fluvio-lacustrine (wadi?)                         | boundary between red sand and pale silty deposition at 73.5m, possible horizontal bioturbation - red tracks on core surface |
| 75        | 10 YR 7/2 light grey                                      | fine silt                                            | quite hard                   | none visible                                                             | instant xx    | fluvio-lacustrine (wadi?)                         |                                                                                                                             |
| 80        | 7.5 YR 6/4 light brown                                    | medium sand to fine silt                             | loose                        | none visible                                                             | instant xx    | fluvio-lacustrine (wadi?)                         |                                                                                                                             |
| 85        | 5 YR 5/8 yellowish red                                    | medium sand to fine silt                             | very loose                   | fine pale/red laminae                                                    | x             | eolian                                            |                                                                                                                             |
| 90        | 5 YR 5/8 yellowish red                                    | medium sand to fine silt                             | loose                        | none visible                                                             | xx            | eolian                                            |                                                                                                                             |
| 92        | 10 YR 8/3 very pale brown                                 | fine silt                                            | quite hard                   | none visible                                                             | x             | eolian                                            | looks like other silt samples which gave xx HCl reaction.                                                                   |
| 95        | 10 YR 8/3 very pale brown                                 | fine silt                                            | quite hard                   | none visible                                                             | xx            | eolian                                            |                                                                                                                             |
| 100       | 7.5 YR 7/3 pink                                           | medium sand                                          | loose                        | none visible                                                             | xx            | fluvio-lacustrine (wadi?)                         |                                                                                                                             |
| 105       | 7.5 YR 6/4 light brown                                    | medium sand                                          | very loose and crumbly       | fine pale/red laminae                                                    | o             | eolian                                            |                                                                                                                             |
| 108       | 2.5 Y 8/1 white                                           | silty                                                | hard                         | none visible                                                             | instant xx    | fluvio-lacustrine (wadi?)                         | very rapid transition from crumbly red to silty pale 107-108m                                                               |
| 110       | 2.5 Y 8/1 white                                           | silty                                                | hard                         | none visible                                                             | instant xx    | fluvio-lacustrine (wadi?)                         |                                                                                                                             |
| 115       | 10 YR 7/2 light grey                                      | fine silty sand                                      | hard, brittle to fairly soft | none visible                                                             | xx            | fluvio-lacustrine (wadi?)                         |                                                                                                                             |
| 120       | 10 YR 7/2 light grey                                      | fine sand                                            | quite soft                   | none visible                                                             | x             | fluvio-lacustrine (wadi?)                         |                                                                                                                             |
| 125       | 10 YR 7/2 light grey                                      | fine sand and clay                                   | brittle and soft             | none                                                                     | xx            | fluvio-lacustrine (wadi?)                         |                                                                                                                             |
| 137       | 10 YR 7/2 light grey with 2.5 YR 5/8 red                  | fine sand and clay                                   | hard                         | grey mottled with pale and dark red patches                              | o             | fluvio-lacustrine (wadi?)                         |                                                                                                                             |

| 151             | 10 YR 8/1 white              | medium and fine sand, and clay             | brittle                        | conglomerate, none visible                                            | xx                    | fluvio-lacustrine (wadi?)         | risotto rock, mottled with some red                                          |
|-----------------|------------------------------|--------------------------------------------|--------------------------------|-----------------------------------------------------------------------|-----------------------|-----------------------------------|------------------------------------------------------------------------------|
| 157.5           | 2.5 YR 5/8 red               | fine sand and clay                         | soft and brittle               | few randomly spaced very fine laminae <1mm                            | x                     | fluvio-lacustrine (wadi?)         | very sudden change to this much darker red at 157, from pale silty sediment. |
|                 |                              |                                            |                                |                                                                       |                       |                                   |                                                                              |
| <b>Core ID:</b> | LIWA/70                      |                                            |                                |                                                                       |                       |                                   |                                                                              |
|                 |                              |                                            |                                |                                                                       |                       |                                   |                                                                              |
| Depth (m)       | Munsell Colour               | Texture                                    | Induration/sorting             | Bedding structures                                                    | HCl reaction*         | Inferred depositional environment | Additional comments                                                          |
| 43              | 10 YR 7/2 light grey         | fine to medium sand                        | weak-medium bound, well sorted | none visible                                                          | instant xx            | eolian                            | dense - no macropores                                                        |
| 55              | reddish brown                | fine to medium sand                        | loose                          |                                                                       | delayed xx            | eolian                            |                                                                              |
| 60              | light grey                   | fine sand                                  | loose                          |                                                                       | xx                    | eolian                            |                                                                              |
| 62              | reddish brown                | medium sand                                | very loose                     | none                                                                  | o                     | eolian                            |                                                                              |
| 70              | reddish brown                | fine to medium sand                        | loose                          |                                                                       | xx                    | eolian                            |                                                                              |
| 75              | reddish brown                | fine to medium sand, some silt             | loose                          |                                                                       | xx                    | eolian                            |                                                                              |
| 80              | reddish brown                | fine to medium sand, some silt             | loose                          |                                                                       | xx                    | eolian                            |                                                                              |
| 85              | 10 YR 7/2 light grey         | fine silty sand                            | hard, well sorted              | none visible                                                          | xx                    | eolian                            |                                                                              |
| 95              | reddish brown                | fine to medium sand                        | loose                          |                                                                       | xx                    | eolian                            |                                                                              |
| 100             | reddish brown                | fine to medium sand                        | loose                          |                                                                       | xx                    | eolian                            |                                                                              |
| 105             | greenish grey                | fine silty sand                            | loose                          |                                                                       | xx                    | eolian                            |                                                                              |
| 110             | reddish brown                | fine to medium sand, some silt             | loose                          |                                                                       | xx                    | eolian                            |                                                                              |
| 111             | 10 YR 7/2 light grey         | fine silty sand                            | strong, well sorted            | none                                                                  | xx                    | eolian                            |                                                                              |
| 119             | 10 YR 7/3 very pale brown    | fine silty sand                            | hard, well sorted              | none                                                                  | xx                    | eolian                            |                                                                              |
| 125             | 7.5 Y 8/2 pale yellow        | fine silty sand                            | hard                           | none visible                                                          | o                     | eolian                            |                                                                              |
| 140             | 2.5 Y 7/3 pale yellow        | fine silty sand                            | very hard                      | none visible                                                          | xx                    | eolian                            | evidence of very small (<1mm) vertical burrows                               |
| 152             | 7.5 R 8/1                    | conglomerate risotto rock, fine silty sand | very hard                      | none visible                                                          | xx                    | eolian                            | lumpy, possible worm burrow vertically and horizontally (red stripes).       |
|                 |                              |                                            |                                |                                                                       |                       |                                   |                                                                              |
|                 |                              |                                            |                                |                                                                       |                       |                                   |                                                                              |
|                 |                              |                                            |                                |                                                                       |                       |                                   |                                                                              |
| <b>Core ID:</b> | LIWA/166                     |                                            |                                |                                                                       |                       |                                   |                                                                              |
|                 |                              |                                            |                                |                                                                       |                       |                                   |                                                                              |
| Depth (m)       | Munsell Colour               | Texture                                    | Induration/sorting             | Bedding structures                                                    | HCl reaction*         | Inferred depositional environment | Additional comments                                                          |
| 0-44            | 5YR5/8 yellowish red         | fine sand                                  | very well sorted               | no preservation of primary sedimentary structures                     | weak                  | eolian                            |                                                                              |
| 44-45           | 5YR5/8 yellowish red         | fine sand                                  | very well sorted               | zone of preservation of steeply dipping trough stratified laminations | weak                  | eolian                            |                                                                              |
| 45-61           | change from 5YR5/8 to 5YR6/6 | fine sand                                  | very well sorted               | no preservation                                                       | none to 59m, x 60-61m | eolian                            | core extremely disturbed                                                     |
| 61-62           | 10YR7/2 light grey           | fine silty sand                            | very well sorted               | none obvious                                                          | very xx               | interdune                         | key interdune (#1)                                                           |

| 62-67                    | 7.5YR6/4 light brown                                                                | sand                                                                            | well sorted                                    | Table DR2                                                                                                        | o               | eolian                                                     | extensive development of fine 1-2mm laminations generally continuous and ? Bimodal (coarse/fine)                                            |
|--------------------------|-------------------------------------------------------------------------------------|---------------------------------------------------------------------------------|------------------------------------------------|------------------------------------------------------------------------------------------------------------------|-----------------|------------------------------------------------------------|---------------------------------------------------------------------------------------------------------------------------------------------|
| 67-77                    | 10YR6/4 light yellowish brown                                                       | sandy silt                                                                      |                                                | none                                                                                                             | x-xx            | interdune-like                                             | interdune #2 start                                                                                                                          |
| 74-80 (nb overlap above) | top 10YR8/1 grades @ 79m to 10YR6/3 pale brown to 80m 10YR6/4 light yellowish brown | silty? Slightly sandy silt. Grades downwards and incr in carbonate content      |                                                | wavy non-parallel laminations contorted bedding - poss disturbed by salt crystallisation - heave - mass movement |                 | inland sabkha                                              | marl with abundant carbonate up to 100% in places. Distinct upper contact at 74/5m                                                          |
| 80-82 distinct contact   | 5YR5/6 yellowish red                                                                | sand                                                                            | bimodal (well sorted lamination by lamination) | laminated                                                                                                        | o-x very slight | eolian                                                     | distinct contact with above                                                                                                                 |
| 82-93                    | 10YR7/4-10YR7/2 yellow to light grey                                                | fine silty sand and fine sand                                                   | very well sorted                               | none                                                                                                             | x-xx            | wadi/aeolian sand infl by post-dep carbonate precipitation |                                                                                                                                             |
| 94-100                   | 10YR6/2 light brownish grey                                                         | fine sand                                                                       | very well sorted                               | none                                                                                                             | x-xx            | post-depositionally modified eolian sand                   | core reformed - didn't stay in barrel                                                                                                       |
| 100-120.5                | incl 10YR6/2 light brownish grey, 7/2 light grey, 8//1 white                        | carbonate rich sands, silts and scarce conglomerates (intraformational pebbles) |                                                | interbedded sands/silts/conglom                                                                                  | x-xx            | fluvio-lacustrine complex poss wadi                        | Lacustrine with intraformational pebbles.                                                                                                   |
| 120.5-128                | 10YR6/3-6/4 pale brown - light yellowish brown                                      | calcareous fine sand, limited silt content                                      | well sorted                                    | none obvious. Iron stained trough cross beds @ 122m                                                              |                 | eolian sand modified by postdep processes                  | core did not stay in barrel                                                                                                                 |
| 128-131.3                | 10YR8/1                                                                             | silt. Scarce iron staining                                                      |                                                | massive                                                                                                          | very xx         | lacustrine, slack water deposit                            | marl. Distinct fine silt                                                                                                                    |
| 131.3-137                | 10R6/4 pale red                                                                     | fine sand                                                                       | well sorted                                    | none                                                                                                             | x-xx            |                                                            | dull red. Mottled - extensive - past bioturbation. Calcareous.                                                                              |
| 137-138                  | 10YR7/3                                                                             | highly calcareous sandy silt                                                    |                                                |                                                                                                                  | very xx         | interdune                                                  | core complete (continuous metre - much cabonate)                                                                                            |
| 138-142.5                | 5YR5/8 yellowish red                                                                | fine sand                                                                       | very well sorted                               | clear laminations                                                                                                | x               | eolian                                                     |                                                                                                                                             |
| 142-155.5                | 10R6/4 pale red mixed w 10R8/2 pinkish white, 10R8/1 white                          | sandy silt and silt                                                             |                                                |                                                                                                                  | o-x very slight | interdune/lacustrine deposit                               | bioturbated                                                                                                                                 |
| 155.5-159                | 2.5YR5/8 red                                                                        | sand                                                                            | very well sorted                               | extensive preservation of trough cross-bedding esp at base                                                       | o               | eolian                                                     | highly cemented, esp towards base. Anhydrite and contact - base dessication - pan evaporatoin surface at dune base                          |
| 160-163                  | 7.5YR5/4                                                                            | sand                                                                            |                                                |                                                                                                                  |                 | eolian sand with extensive post-dep modification           | varying anhydrite conditions                                                                                                                |
|                          |                                                                                     |                                                                                 |                                                |                                                                                                                  |                 |                                                            |                                                                                                                                             |
|                          |                                                                                     |                                                                                 |                                                |                                                                                                                  |                 |                                                            |                                                                                                                                             |
| <b>Core ID:</b>          | LIWA/172                                                                            |                                                                                 |                                                |                                                                                                                  |                 |                                                            |                                                                                                                                             |
|                          |                                                                                     |                                                                                 |                                                |                                                                                                                  |                 |                                                            |                                                                                                                                             |
| Depth (m)                | Munsell Colour                                                                      | Texture                                                                         | Induration/sorting                             | Bedding structures                                                                                               | HCl reaction*   | Inferred depositional environment                          | Additional comments                                                                                                                         |
| 0-54                     | 5YR5/8                                                                              | fine sand                                                                       | very well sorted                               |                                                                                                                  | o               | eolian                                                     | mostly disturbed by drilling, but blocks poss 50-54m, indic steeply dipping x-bedding w. bimodal well sorted grain size between laminations |
| 54-55                    | 5YR8/1 white                                                                        | fine sand                                                                       | well sorted                                    |                                                                                                                  | xx              | interdune                                                  | carbonate content. Distinct contacts top and bottom                                                                                         |
| 55-56                    | 5YR5/8                                                                              | fine sand                                                                       | very well sorted                               |                                                                                                                  | o               | eolian                                                     |                                                                                                                                             |
| 57-58                    | 5YR7/1                                                                              | fine sand                                                                       | very well sorted                               |                                                                                                                  | v xx rapid      | interdune                                                  |                                                                                                                                             |
| 58-59.5                  | 5YR5/8                                                                              | sand                                                                            | well sorted                                    | laminated                                                                                                        |                 | eolian                                                     |                                                                                                                                             |
| 59.5-60                  | 10YR7/3                                                                             | fine sand                                                                       | very well sorted                               |                                                                                                                  | x-xx            | interdune                                                  | scarce iron staining                                                                                                                        |

| 60-72.5         | 5YR5/8 and 4/6                                          | fine sand                                                                                                  | well sorted,<br>slightly cemented        | well expressed laminations<br>Table DR2                                      | slight                     | eolian                                               |                                                                                                                                                |
|-----------------|---------------------------------------------------------|------------------------------------------------------------------------------------------------------------|------------------------------------------|------------------------------------------------------------------------------|----------------------------|------------------------------------------------------|------------------------------------------------------------------------------------------------------------------------------------------------|
| 72.5-76         | 10YR6/3                                                 | sandy silt                                                                                                 | very well sorted                         | no obvious primary<br>sedimentary structures                                 | v xx rapid                 | ?loess dune/interdune with large<br>fines content    | really high silt content                                                                                                                       |
| 76-76.7         | 5YR4/6 yellowish red                                    | sand                                                                                                       | very well sorted                         | laminated bimodally.<br>Distributed grain size between<br>laminations        |                            | eolian                                               |                                                                                                                                                |
| 76.7-86         | 10YR5/3                                                 | sandy silt                                                                                                 | very well sorted                         | no obvious (scarce<br>laminations?)                                          | xx                         | loess? Aeolian/interdune with<br>post-dep mod        | carbonate near surface (post-depositional<br>modification)                                                                                     |
| 87-89.7         | 2.5Y7/2-6/3                                             | sandy silt to silty sand<br>(very fine)                                                                    | friable. Very well<br>sorted             |                                                                              | xx                         | interdune                                            |                                                                                                                                                |
| 89.7-91.8       | 5YR5/4                                                  | very fine sand, some silt<br>content in places                                                             | very well sorted                         | none obvious. Scarce mottling                                                | x-xx                       | eolian                                               |                                                                                                                                                |
| 91.8-97         | 10YR8/1 to 7/2 white<br>to light grey                   | silt (v limited sand<br>content). Vv fine                                                                  |                                          | none obvious.                                                                | high xx                    | standing water/playa/interdune                       | polygonal cracking - very fine                                                                                                                 |
| 97-102.5        | 10YR8/1 to 7/2 white<br>to light grey                   | fine sand, minor medium<br>sand                                                                            | well sorted                              |                                                                              | limited -<br>strange!      | inferred wadi deposits                               | sandy compared to 91.8-97, which is silty.                                                                                                     |
| 102.5-113       | 10YR7/3, 7/1, 8/1                                       | mixed sandy conglomerate<br>and sand, pebbles<br>generally react with acids,<br>sandy matrix less reactive | sand very well<br>sorted and<br>bleached | none obvious, except scarce<br>bedding assoc with pabble<br>layers           |                            | wadi/fluviodeltaic complex                           |                                                                                                                                                |
| 113-116         | 2.5YR5/8 red                                            | fine sand                                                                                                  | very well sorted                         | some mottling                                                                | x                          | eolian                                               |                                                                                                                                                |
| 116-119         | 7.5YR6/4 down core to<br>2.5YR7/3                       | sand                                                                                                       | poorly sorted                            | coarse and fine cross beds.<br>Dominant fine sand grain size                 | x-xx                       | inferred wadi deposits                               | distinct upper contact. Lower contact more<br>gradational. The 2.5YR7/3 sed is better sorted<br>(like a dune with no coarse grain laminations) |
| 119-119.5       | 10YR7/2                                                 | silt. No sand content                                                                                      |                                          | none                                                                         | limited to x<br>(?delayed) | distinctive slack water deposit                      | grades downwards to next unit                                                                                                                  |
| 119.5-120.5     | 2.5YR6/3                                                | silty sand                                                                                                 | v friable                                | none obvious                                                                 | xx                         | ?interdune sand grading upwards<br>into playa        |                                                                                                                                                |
| 120.5-121.5     | 10YR8/1-2.5YR7/3                                        | silt                                                                                                       | highly cemented                          |                                                                              | very xx some<br>delayed    | standing water passively<br>sedimented unit          |                                                                                                                                                |
| 212.5-122.2     | 2.5YR5/8                                                | fine sand                                                                                                  | very well sorted                         | laminated small-medium scale<br>trough cross bedding                         | o-slight                   | poss eolian unit with lacustrine/<br>fluvial complex |                                                                                                                                                |
| 122.2-123       | 10YR8/1                                                 | silt                                                                                                       | massive. Very<br>consolidated            |                                                                              | xx                         | slack water playa deposit                            | highly calcareous. Continuous core                                                                                                             |
|                 |                                                         |                                                                                                            |                                          |                                                                              |                            |                                                      |                                                                                                                                                |
|                 |                                                         |                                                                                                            |                                          |                                                                              |                            |                                                      |                                                                                                                                                |
| <b>Core ID:</b> | LIWA/322                                                |                                                                                                            |                                          |                                                                              |                            |                                                      |                                                                                                                                                |
|                 |                                                         |                                                                                                            |                                          |                                                                              |                            |                                                      |                                                                                                                                                |
| Depth (m)       | Munsell Colour                                          | Texture                                                                                                    | Induration/<br>sorting                   | Bedding structures                                                           | HCl<br>reaction*           | Inferred depositional<br>environment                 | Additional comments                                                                                                                            |
| 0-51            | 7.5YR6/8 yellowish red                                  | fine sand some medium<br>fraction                                                                          | well sorted                              |                                                                              |                            | eolian                                               |                                                                                                                                                |
| 52-53           | grades into 7.5R8/1-<br>8/1 pinkish white<br>downwards  | cemented sand                                                                                              |                                          |                                                                              | xx                         | interdune/fluvio-lacustrine facies                   |                                                                                                                                                |
| 54-79           | 5YR5/6 yellowish red                                    | moist unconsolidated fine<br>sand                                                                          | very well sorted                         |                                                                              |                            | eolian                                               | contrast to dry core descriptions, especially with<br>respect to colour                                                                        |
| 80-84           | 7.5YR7/1 light grey<br>grades down to<br>5YR5/8 ysh red | cemented silty sand with<br>aeolian sand fraction                                                          |                                          | none obvious                                                                 | grades into xx<br>high     | eolian                                               | carbonates decrease systematically down<br>section. Distinct contact at top.                                                                   |
| 85-100          | 5YR5/6 yellowish red                                    | sand                                                                                                       | very well sorted                         | prim strs based on core break<br>lines. low-med dip lamtd.<br>Some steep dip |                            | eolian                                               |                                                                                                                                                |

| 100-108                                                                                                                                                                                                                    | 10YR5/4 ysh brown grades down to 5YR 5/6                                               | fine sand with slight silt content                                              |                       | Table DR2                                                | xx decr to o at 108            | packet of interdune down to eolian dune                    |                                                                                                                                                  |
|----------------------------------------------------------------------------------------------------------------------------------------------------------------------------------------------------------------------------|----------------------------------------------------------------------------------------|---------------------------------------------------------------------------------|-----------------------|----------------------------------------------------------|--------------------------------|------------------------------------------------------------|--------------------------------------------------------------------------------------------------------------------------------------------------|
| 110-112                                                                                                                                                                                                                    |                                                                                        | fine silt dominated marl                                                        |                       |                                                          | top xx                         | fluvio-lacustrine complex                                  | grades from below                                                                                                                                |
| 113-114                                                                                                                                                                                                                    | 2.5Y5/3 light olive brown                                                              | calcareous sand                                                                 |                       |                                                          |                                | eolian                                                     |                                                                                                                                                  |
| 114-123                                                                                                                                                                                                                    |                                                                                        | variably calcareous sand                                                        | very well sorted      |                                                          |                                | inferred wadi deposits                                     |                                                                                                                                                  |
| 124-133.5                                                                                                                                                                                                                  |                                                                                        | marl                                                                            | well cemented         |                                                          | xx                             | lacustrine                                                 | well preserved in drill core sections                                                                                                            |
| within - 129-130                                                                                                                                                                                                           | 10R5/3-4/3 weak red                                                                    | brief interval of non-calcareous red sand                                       | very well sorted      |                                                          |                                | eolian                                                     |                                                                                                                                                  |
| 134-143                                                                                                                                                                                                                    | 10R5/6-8/1                                                                             | variably cemented to calcareous sands with silt dom lenses, some up to 3m thick |                       |                                                          |                                | eoilan                                                     | sand dominated                                                                                                                                   |
| 143-146.5                                                                                                                                                                                                                  |                                                                                        | distinct marl, no sand content, entirely siltstone                              |                       | uniform - no primary sed structures                      | xx                             | lacustrine                                                 | distinct contact at 146.5m with underlying red laminated sand                                                                                    |
| 146.5-161                                                                                                                                                                                                                  | 10R5/6-8/1                                                                             | fine fluffy sand, no coarse component or pebbles                                | very well sorted      | laminations distinctly seen through colour changes       |                                | eolian                                                     | uniformity of facies over c.10m mottles of 2.5YR5/8 near base and lower 7m - big pile of aeolian sand with a few intercalated interdune deposits |
| Positions of key marl deposits from bottom - 146-143.5, 137-128, 133.5-130, 128-110 (lacustrine with odd intercalated sandy layers), 102 (weak interdune), 76-78 (interdune grading downwards), 58 (v. weak interdune), 51 |                                                                                        |                                                                                 |                       |                                                          |                                |                                                            |                                                                                                                                                  |
|                                                                                                                                                                                                                            |                                                                                        |                                                                                 |                       |                                                          |                                |                                                            |                                                                                                                                                  |
|                                                                                                                                                                                                                            |                                                                                        |                                                                                 |                       |                                                          |                                |                                                            |                                                                                                                                                  |
| <b>Core ID:</b>                                                                                                                                                                                                            | LIWA/305                                                                               |                                                                                 |                       |                                                          |                                |                                                            |                                                                                                                                                  |
|                                                                                                                                                                                                                            |                                                                                        |                                                                                 |                       |                                                          |                                |                                                            |                                                                                                                                                  |
| Depth (m)                                                                                                                                                                                                                  | Munsell Colour                                                                         | Texture                                                                         | Induration/sorting    | Bedding structures                                       | HCl reaction*                  | Inferred depositional environment                          | Additional comments                                                                                                                              |
| BOXES MISSING                                                                                                                                                                                                              | 59-64, 69-71, 75, 77, 79, 83-85, 88, 92-93, 95, 97, 99, 103, 105-110, 113-115, 120-122 |                                                                                 |                       |                                                          |                                |                                                            |                                                                                                                                                  |
| EMPTY BOXES                                                                                                                                                                                                                | 161-168, 155, 150, 146, 137, 112                                                       |                                                                                 |                       |                                                          |                                |                                                            |                                                                                                                                                  |
| 46-67                                                                                                                                                                                                                      | 10YR7/4-7/6 very pale brown-yellow                                                     | fine to medium sand                                                             | well sorted           | obliterated, small laminations visible in places         | variable o-xx                  | eolian                                                     | not properly cored                                                                                                                               |
| 68-104                                                                                                                                                                                                                     | 7.5YR6/6-6/8 reddish yellow                                                            | fine sand                                                                       | well sorted           | small pale/dark 1mm laminations, dark & coarser grained. | x                              | eolian                                                     | variable degree of lamination, dipping steeply.                                                                                                  |
| 111                                                                                                                                                                                                                        | 7.5YR8/4-8/6 pink-reddish yellow                                                       | silty sand                                                                      | well sorted           | none visible                                             | xx                             | inferred start of interdune                                |                                                                                                                                                  |
| 115-119                                                                                                                                                                                                                    | 7.5YR6/6-6/8 reddish yellow                                                            | fine sand coarsening at base, and increasingly calcareous                       | well sorted           | same laminations at 117m, otherwise none.                | o-xx thru dune section downwds | eolian                                                     |                                                                                                                                                  |
| 123-136                                                                                                                                                                                                                    | 2.5Y8/1-8/2 white - pale yellow                                                        | silty sand, becoming sandy silt at 129m, increasing ncr grain size through core | well sorted           | none                                                     | xx-o down core                 | thick white interdune (lacust?) marl to reworked dune sand |                                                                                                                                                  |
| 136                                                                                                                                                                                                                        | 2.5Y8/1 white                                                                          | fine sand 'risotto' texture, rip up clasts                                      | medium to well sorted | none                                                     | xx                             | inferred wadi deposits                                     | mottled slightly darker pink in chunks, carbonate nodules.                                                                                       |
| 138-140                                                                                                                                                                                                                    | 5Y8/1 white                                                                            | sil, possibly with some clay (cracking)                                         | well sorted           | none                                                     | o/x to xx down core            | fluvio/lacustrine                                          | looks identical but v weak HCl reaction 138-9 and strong 139-40                                                                                  |
| 140-141.5                                                                                                                                                                                                                  | mottling*                                                                              | 'risotto texture', pebble size decreases down core                              | well sorted           | none                                                     | x                              | inferred wadi deposits                                     |                                                                                                                                                  |
| 141.5-149                                                                                                                                                                                                                  | as above down to 10YR8/2-7/2 very pale brown - light grey                              | fine sand                                                                       | well sorted           | none (obliterated?)                                      | x throughout                   | eolian                                                     | decreasingly mottled, increasingly sandy pinkish deposits - start of wadi/interdune/lacustrine phase                                             |



Table DR2

|                   |                                                                              |                                                                  |               |                                |                         |                           |                                                                                                                      |
|-------------------|------------------------------------------------------------------------------|------------------------------------------------------------------|---------------|--------------------------------|-------------------------|---------------------------|----------------------------------------------------------------------------------------------------------------------|
| 151-159           | 5YR/81 white mottled w 5YR8/4 pint to 5YR8/1 white to 7.5YR8/2 pinkish white | clay to silty sand to fine sand downwards changing white deposit | well sorted   | none                           | variable x-xx top v xx  | start of interdune phase? | white/orange mottled clay/silt changes to pinkish sandy silt (aeolian) and paler grey fine sand (aeolian) down core. |
| 160-171           | 5YR7/3 pink to 5YR6/8 reddish yellow at base                                 | fine sand                                                        | well sorted   | some visible at top of section | o-xx variable downwards | aeolian                   |                                                                                                                      |
| 66 (within above) | 5YR8/1 white and 5YR8/3 pink                                                 | risotto layer'. Thickness unsure due to core loss                | poorly sorted | none                           | x                       |                           |                                                                                                                      |

Data Repository Table 3

| <i>Sample</i> | $D_e$ (Gy) | Error<br>(random)<br>(Gy) | Recycling ratio | Error<br>(combined)<br>(Gy) |
|---------------|------------|---------------------------|-----------------|-----------------------------|
| liwa/40b/15   | 3.53 ±0.24 |                           | 0.98            | ±0.27                       |
| liwa/40b/15   | 4.23 ±0.25 |                           | 0.93            | ±0.28                       |
| liwa/40b/15   | 4.94 ±0.33 |                           | 0.99            | ±0.36                       |
| liwa/40b/15   | 4.41 ±0.43 |                           | 1.02            | ±0.45                       |
| liwa/40b/15   | 3.80 ±0.26 |                           | 1.07            | ±0.28                       |
| liwa/40b/15   | 5.46 ±0.27 |                           | 0.94            | ±0.31                       |
| liwa/40b/15   | 4.97 ±0.11 |                           | 0.94            | ±0.18                       |
| liwa/40b/15   | 3.96 ±0.17 |                           | 0.97            | ±0.20                       |
| liwa/40b/15   | 3.75 ±0.09 |                           | 0.98            | ±0.14                       |
| liwa/40b/15   | 3.99 ±0.12 |                           | 1.06            | ±0.17                       |

| <i>Sample</i> | $D_e$ (Gy) | Error<br>(random)<br>(Gy) | Recycling ratio | Error<br>(combined)<br>(Gy) |
|---------------|------------|---------------------------|-----------------|-----------------------------|
| liwa/40/20    | 3.92 ±0.14 |                           | 0.90            | ±0.18                       |
| liwa/40/20    | 4.46 ±0.15 |                           | 0.93            | ±0.20                       |
| liwa/40/20    | 3.48 ±0.10 |                           | 1.05            | ±0.15                       |
| liwa/40/20    | 4.64 ±0.17 |                           | 1.00            | ±0.22                       |
| liwa/40/20    | 4.00 ±0.15 |                           | 1.02            | ±0.19                       |
| liwa/40/20    | 4.35 ±0.13 |                           | 1.10            | ±0.18                       |

| <i>Sample</i> | $D_e$ (Gy) | Error<br>(random)<br>(Gy) | Recycling ratio | Error<br>(combined)<br>(Gy) |
|---------------|------------|---------------------------|-----------------|-----------------------------|
| Liwa/40b/22   | 3.02 ±0.08 |                           | 0.98            | ±0.28                       |
| Liwa/40b/22   | 3.25 ±0.11 |                           | 0.97            | ±0.30                       |
| Liwa/40b/22   | 3.41 ±0.16 |                           | 1.01            | ±0.34                       |
| Liwa/40b/22   | 3.53 ±0.12 |                           | 1.08            | ±0.33                       |
| Liwa/40b/22   | 3.54 ±0.09 |                           | 1.05            | ±0.32                       |
| Liwa/40b/22   | 3.64 ±0.15 |                           | 0.94            | ±0.35                       |
| Liwa/40b/22   | 3.67 ±0.12 |                           | 1.03            | ±0.34                       |
| Liwa/40b/22   | 3.72 ±0.13 |                           | 0.92            | ±0.35                       |
| Liwa/40b/22   | 3.76 ±0.14 |                           | 0.99            | ±0.36                       |
| Liwa/40b/22   | 3.76 ±0.16 |                           | 0.98            | ±0.36                       |
| Liwa/40b/22   | 3.77 ±0.06 |                           | 1.09            | ±0.33                       |
| Liwa/40b/22   | 3.78 ±0.12 |                           | 1.00            | ±0.35                       |
| Liwa/40b/22   | 3.79 ±0.15 |                           | 0.92            | ±0.36                       |
| Liwa/40b/22   | 3.79 ±0.16 |                           | 1.00            | ±0.37                       |
| Liwa/40b/22   | 3.80 ±0.11 |                           | 1.13            | ±0.35                       |
| Liwa/40b/22   | 3.80 ±0.17 |                           | 1.04            | ±0.37                       |
| Liwa/40b/22   | 3.84 ±0.15 |                           | 1.06            | ±0.37                       |
| Liwa/40b/22   | 3.85 ±0.09 |                           | 0.95            | ±0.35                       |
| Liwa/40b/22   | 3.88 ±0.15 |                           | 0.92            | ±0.37                       |
| Liwa/40b/22   | 3.89 ±0.10 |                           | 0.99            | ±0.35                       |
| Liwa/40b/22   | 3.91 ±0.15 |                           | 1.01            | ±0.37                       |
| Liwa/40b/22   | 3.93 ±0.16 |                           | 0.93            | ±0.38                       |
| Liwa/40b/22   | 3.93 ±0.06 |                           | 0.94            | ±0.35                       |

|             |            |      |       |
|-------------|------------|------|-------|
| Liwa/40b/22 | 3.94 ±0.17 | 1.04 | ±0.38 |
| Liwa/40b/22 | 3.95 ±0.18 | 1.07 | ±0.39 |
| Liwa/40b/22 | 3.96 ±0.15 | 0.87 | ±0.38 |
| Liwa/40b/22 | 3.97 ±0.17 | 1.08 | ±0.38 |
| Liwa/40b/22 | 3.97 ±0.18 | 0.97 | ±0.39 |
| Liwa/40b/22 | 3.98 ±0.14 | 1.05 | ±0.37 |
| Liwa/40b/22 | 3.99 ±0.11 | 1.05 | ±0.36 |
| Liwa/40b/22 | 4.03 ±0.15 | 0.95 | ±0.38 |
| Liwa/40b/22 | 4.04 ±0.16 | 1.03 | ±0.39 |
| Liwa/40b/22 | 4.05 ±0.15 | 0.98 | ±0.38 |
| Liwa/40b/22 | 4.06 ±0.13 | 1.02 | ±0.38 |
| Liwa/40b/22 | 4.06 ±0.20 | 0.99 | ±0.41 |
| Liwa/40b/22 | 4.06 ±0.21 | 0.97 | ±0.41 |
| Liwa/40b/22 | 4.07 ±0.14 | 0.98 | ±0.38 |
| Liwa/40b/22 | 4.07 ±0.17 | 1.12 | ±0.39 |
| Liwa/40b/22 | 4.09 ±0.13 | 1.02 | ±0.38 |
| Liwa/40b/22 | 4.09 ±0.11 | 1.01 | ±0.37 |
| Liwa/40b/22 | 4.10 ±0.15 | 1.14 | ±0.39 |
| Liwa/40b/22 | 4.11 ±0.14 | 0.97 | ±0.38 |
| Liwa/40b/22 | 4.12 ±0.14 | 1.13 | ±0.38 |
| Liwa/40b/22 | 4.14 ±0.11 | 1.15 | ±0.38 |
| Liwa/40b/22 | 4.15 ±0.12 | 0.92 | ±0.38 |
| Liwa/40b/22 | 4.15 ±0.14 | 0.91 | ±0.39 |
| Liwa/40b/22 | 4.16 ±0.16 | 1.11 | ±0.40 |
| Liwa/40b/22 | 4.16 ±0.17 | 1.10 | ±0.40 |
| Liwa/40b/22 | 4.17 ±0.17 | 0.91 | ±0.40 |
| Liwa/40b/22 | 4.17 ±0.18 | 0.98 | ±0.40 |
| Liwa/40b/22 | 4.18 ±0.15 | 1.05 | ±0.39 |
| Liwa/40b/22 | 4.18 ±0.11 | 0.87 | ±0.38 |
| Liwa/40b/22 | 4.19 ±0.14 | 1.04 | ±0.39 |
| Liwa/40b/22 | 4.19 ±0.12 | 0.86 | ±0.38 |
| Liwa/40b/22 | 4.19 ±0.18 | 1.00 | ±0.41 |
| Liwa/40b/22 | 4.20 ±0.13 | 0.87 | ±0.39 |
| Liwa/40b/22 | 4.20 ±0.16 | 1.07 | ±0.40 |
| Liwa/40b/22 | 4.20 ±0.13 | 0.99 | ±0.39 |
| Liwa/40b/22 | 4.21 ±0.19 | 1.00 | ±0.41 |
| Liwa/40b/22 | 4.21 ±0.18 | 1.07 | ±0.41 |
| Liwa/40b/22 | 4.21 ±0.13 | 1.05 | ±0.39 |
| Liwa/40b/22 | 4.22 ±0.18 | 0.96 | ±0.41 |
| Liwa/40b/22 | 4.22 ±0.17 | 1.01 | ±0.41 |
| Liwa/40b/22 | 4.22 ±0.10 | 1.07 | ±0.38 |
| Liwa/40b/22 | 4.23 ±0.18 | 0.97 | ±0.41 |
| Liwa/40b/22 | 4.23 ±0.17 | 1.07 | ±0.41 |
| Liwa/40b/22 | 4.24 ±0.19 | 0.96 | ±0.41 |
| Liwa/40b/22 | 4.24 ±0.11 | 0.99 | ±0.39 |
| Liwa/40b/22 | 4.25 ±0.15 | 0.98 | ±0.40 |
| Liwa/40b/22 | 4.25 ±0.18 | 0.96 | ±0.41 |
| Liwa/40b/22 | 4.25 ±0.13 | 0.99 | ±0.39 |
| Liwa/40b/22 | 4.25 ±0.16 | 0.99 | ±0.40 |
| Liwa/40b/22 | 4.25 ±0.12 | 1.06 | ±0.39 |
| Liwa/40b/22 | 4.25 ±0.08 | 0.99 | ±0.38 |

|             |            |      |       |
|-------------|------------|------|-------|
| Liwa/40b/22 | 4.26 ±0.16 | 0.97 | ±0.40 |
| Liwa/40b/22 | 4.27 ±0.10 | 1.02 | ±0.38 |
| Liwa/40b/22 | 4.27 ±0.15 | 1.00 | ±0.40 |
| Liwa/40b/22 | 4.27 ±0.13 | 1.02 | ±0.39 |
| Liwa/40b/22 | 4.28 ±0.17 | 1.02 | ±0.41 |
| Liwa/40b/22 | 4.28 ±0.22 | 0.91 | ±0.43 |
| Liwa/40b/22 | 4.28 ±0.14 | 0.92 | ±0.40 |
| Liwa/40b/22 | 4.29 ±0.16 | 1.05 | ±0.41 |
| Liwa/40b/22 | 4.29 ±0.16 | 0.94 | ±0.41 |
| Liwa/40b/22 | 4.29 ±0.16 | 0.92 | ±0.41 |
| Liwa/40b/22 | 4.30 ±0.16 | 1.04 | ±0.41 |
| Liwa/40b/22 | 4.30 ±0.11 | 1.06 | ±0.39 |
| Liwa/40b/22 | 4.30 ±0.16 | 1.01 | ±0.41 |
| Liwa/40b/22 | 4.31 ±0.15 | 1.05 | ±0.40 |
| Liwa/40b/22 | 4.31 ±0.14 | 1.03 | ±0.40 |
| Liwa/40b/22 | 4.32 ±0.18 | 1.09 | ±0.42 |
| Liwa/40b/22 | 4.32 ±0.13 | 1.05 | ±0.40 |
| Liwa/40b/22 | 4.33 ±0.16 | 1.01 | ±0.41 |
| Liwa/40b/22 | 4.33 ±0.14 | 0.97 | ±0.40 |
| Liwa/40b/22 | 4.33 ±0.12 | 1.04 | ±0.39 |
| Liwa/40b/22 | 4.33 ±0.17 | 1.06 | ±0.41 |
| Liwa/40b/22 | 4.34 ±0.20 | 1.02 | ±0.43 |
| Liwa/40b/22 | 4.34 ±0.13 | 0.95 | ±0.40 |
| Liwa/40b/22 | 4.34 ±0.15 | 1.09 | ±0.41 |
| Liwa/40b/22 | 4.34 ±0.15 | 1.00 | ±0.41 |
| Liwa/40b/22 | 4.35 ±0.14 | 0.92 | ±0.40 |
| Liwa/40b/22 | 4.35 ±0.14 | 1.00 | ±0.40 |
| Liwa/40b/22 | 4.35 ±0.15 | 1.13 | ±0.41 |
| Liwa/40b/22 | 4.36 ±0.19 | 1.04 | ±0.42 |
| Liwa/40b/22 | 4.37 ±0.18 | 1.06 | ±0.42 |
| Liwa/40b/22 | 4.38 ±0.15 | 0.95 | ±0.41 |
| Liwa/40b/22 | 4.38 ±0.14 | 0.92 | ±0.41 |
| Liwa/40b/22 | 4.38 ±0.13 | 0.99 | ±0.40 |
| Liwa/40b/22 | 4.39 ±0.20 | 1.01 | ±0.43 |
| Liwa/40b/22 | 4.40 ±0.17 | 0.93 | ±0.42 |
| Liwa/40b/22 | 4.40 ±0.14 | 0.94 | ±0.41 |
| Liwa/40b/22 | 4.40 ±0.11 | 1.04 | ±0.40 |
| Liwa/40b/22 | 4.40 ±0.15 | 1.07 | ±0.41 |
| Liwa/40b/22 | 4.41 ±0.18 | 0.87 | ±0.43 |
| Liwa/40b/22 | 4.42 ±0.12 | 1.08 | ±0.40 |
| Liwa/40b/22 | 4.44 ±0.17 | 0.97 | ±0.42 |
| Liwa/40b/22 | 4.45 ±0.11 | 1.05 | ±0.40 |
| Liwa/40b/22 | 4.45 ±0.13 | 1.05 | ±0.41 |
| Liwa/40b/22 | 4.46 ±0.14 | 0.95 | ±0.41 |
| Liwa/40b/22 | 4.47 ±0.15 | 1.03 | ±0.42 |
| Liwa/40b/22 | 4.47 ±0.15 | 0.98 | ±0.42 |
| Liwa/40b/22 | 4.47 ±0.19 | 1.02 | ±0.44 |
| Liwa/40b/22 | 4.49 ±0.19 | 0.99 | ±0.43 |
| Liwa/40b/22 | 4.50 ±0.15 | 0.97 | ±0.42 |
| Liwa/40b/22 | 4.50 ±0.11 | 0.98 | ±0.41 |
| Liwa/40b/22 | 4.50 ±0.11 | 1.12 | ±0.41 |

|             |            |      |       |
|-------------|------------|------|-------|
| Liwa/40b/22 | 4.50 ±0.16 | 1.02 | ±0.42 |
| Liwa/40b/22 | 4.50 ±0.15 | 1.01 | ±0.42 |
| Liwa/40b/22 | 4.50 ±0.13 | 1.14 | ±0.41 |
| Liwa/40b/22 | 4.50 ±0.16 | 0.97 | ±0.42 |
| Liwa/40b/22 | 4.52 ±0.14 | 1.13 | ±0.42 |
| Liwa/40b/22 | 4.52 ±0.19 | 1.15 | ±0.44 |
| Liwa/40b/22 | 4.53 ±0.18 | 0.92 | ±0.43 |
| Liwa/40b/22 | 4.54 ±0.14 | 0.91 | ±0.42 |
| Liwa/40b/22 | 4.54 ±0.15 | 1.11 | ±0.42 |
| Liwa/40b/22 | 4.55 ±0.13 | 1.10 | ±0.42 |
| Liwa/40b/22 | 4.55 ±0.14 | 0.91 | ±0.42 |
| Liwa/40b/22 | 4.55 ±0.15 | 0.98 | ±0.42 |
| Liwa/40b/22 | 4.56 ±0.20 | 1.05 | ±0.44 |
| Liwa/40b/22 | 4.56 ±0.16 | 0.87 | ±0.43 |
| Liwa/40b/22 | 4.56 ±0.20 | 1.04 | ±0.44 |
| Liwa/40b/22 | 4.57 ±0.15 | 0.86 | ±0.43 |
| Liwa/40b/22 | 4.58 ±0.18 | 1.00 | ±0.44 |
| Liwa/40b/22 | 4.59 ±0.21 | 0.87 | ±0.45 |
| Liwa/40b/22 | 4.59 ±0.13 | 1.07 | ±0.42 |
| Liwa/40b/22 | 4.60 ±0.17 | 0.99 | ±0.43 |
| Liwa/40b/22 | 4.61 ±0.16 | 1.00 | ±0.43 |
| Liwa/40b/22 | 4.61 ±0.24 | 1.07 | ±0.47 |
| Liwa/40b/22 | 4.61 ±0.23 | 1.05 | ±0.46 |
| Liwa/40b/22 | 4.62 ±0.20 | 0.96 | ±0.45 |
| Liwa/40b/22 | 4.62 ±0.16 | 1.01 | ±0.43 |
| Liwa/40b/22 | 4.63 ±0.18 | 1.07 | ±0.44 |
| Liwa/40b/22 | 4.64 ±0.15 | 0.97 | ±0.43 |
| Liwa/40b/22 | 4.65 ±0.19 | 1.07 | ±0.45 |
| Liwa/40b/22 | 4.66 ±0.12 | 0.96 | ±0.42 |
| Liwa/40b/22 | 4.67 ±0.20 | 0.99 | ±0.45 |
| Liwa/40b/22 | 4.67 ±0.13 | 0.98 | ±0.43 |
| Liwa/40b/22 | 4.69 ±0.16 | 0.96 | ±0.44 |
| Liwa/40b/22 | 4.69 ±0.18 | 0.99 | ±0.45 |
| Liwa/40b/22 | 4.70 ±0.15 | 0.99 | ±0.44 |
| Liwa/40b/22 | 4.72 ±0.19 | 1.06 | ±0.45 |
| Liwa/40b/22 | 4.74 ±0.18 | 0.99 | ±0.45 |
| Liwa/40b/22 | 4.75 ±0.20 | 0.97 | ±0.46 |
| Liwa/40b/22 | 4.76 ±0.23 | 1.02 | ±0.47 |
| Liwa/40b/22 | 4.76 ±0.16 | 1.00 | ±0.44 |
| Liwa/40b/22 | 4.77 ±0.23 | 1.02 | ±0.47 |
| Liwa/40b/22 | 4.77 ±0.20 | 1.02 | ±0.46 |
| Liwa/40b/22 | 4.79 ±0.20 | 0.91 | ±0.46 |
| Liwa/40b/22 | 4.82 ±0.23 | 0.92 | ±0.48 |
| Liwa/40b/22 | 4.86 ±0.23 | 1.05 | ±0.48 |
| Liwa/40b/22 | 4.89 ±0.15 | 0.94 | ±0.45 |
| Liwa/40b/22 | 4.90 ±0.17 | 0.92 | ±0.46 |
| Liwa/40b/22 | 4.92 ±0.16 | 1.04 | ±0.46 |
| Liwa/40b/22 | 4.92 ±0.13 | 1.06 | ±0.45 |
| Liwa/40b/22 | 4.99 ±0.13 | 1.01 | ±0.45 |
| Liwa/40b/22 | 5.01 ±0.17 | 1.05 | ±0.47 |
| Liwa/40b/22 | 5.04 ±0.14 | 1.03 | ±0.46 |

|             |            |      |       |
|-------------|------------|------|-------|
| Liwa/40b/22 | 5.05 ±0.13 | 1.09 | ±0.46 |
| Liwa/40b/22 | 5.05 ±0.22 | 1.05 | ±0.49 |
| Liwa/40b/22 | 5.09 ±0.12 | 1.01 | ±0.46 |
| Liwa/40b/22 | 5.10 ±0.17 | 0.97 | ±0.47 |
| Liwa/40b/22 | 5.15 ±0.20 | 1.04 | ±0.49 |
| Liwa/40b/22 | 5.19 ±0.16 | 1.06 | ±0.48 |
| Liwa/40b/22 | 5.24 ±0.19 | 1.02 | ±0.49 |
| Liwa/40b/22 | 5.26 ±0.17 | 0.99 | ±0.49 |
| Liwa/40b/22 | 5.28 ±0.20 | 0.97 | ±0.50 |
| Liwa/40b/22 | 5.28 ±0.28 | 1.02 | ±0.54 |
| Liwa/40b/22 | 5.47 ±0.17 | 1.00 | ±0.51 |
| Liwa/40b/22 | 5.51 ±0.14 | 1.02 | ±0.50 |
| Liwa/40b/22 | 5.61 ±0.25 | 1.02 | ±0.55 |
| Liwa/40b/22 | 5.97 ±0.31 | 0.91 | ±0.60 |

| <i>Sample</i> | <i>D<sub>e</sub></i> (Gy) | Error (random) (Gy) | Recycling ratio | Error (combined) (Gy) |
|---------------|---------------------------|---------------------|-----------------|-----------------------|
| liwa/40/24    | 3.47 ±0.09                |                     | 1.04            | ±0.14                 |
| liwa/40/24    | 4.96 ±0.11                |                     | 0.97            | ±0.19                 |
| liwa/40/24    | 3.66 ±0.13                |                     | 0.94            | ±0.17                 |
| liwa/40/24    | 3.60 ±0.12                |                     | 0.92            | ±0.16                 |
| liwa/40/24    | 4.31 ±0.12                |                     | 0.98            | ±0.17                 |
| liwa/40/24    | 4.46 ±0.12                |                     | 0.91            | ±0.18                 |
| liwa/40/24    | 5.16 ±0.15                |                     | 0.99            | ±0.22                 |

| <i>Sample</i> | <i>D<sub>e</sub></i> (Gy) | Error (random) (Gy) | Recycling ratio | Error (combined) (Gy) |
|---------------|---------------------------|---------------------|-----------------|-----------------------|
| liwa/40b/26   | 4.69 ±0.36                |                     | 0.92            | ±0.39                 |
| liwa/40b/26   | 4.65 ±0.30                |                     | 1.05            | ±0.33                 |
| liwa/40b/26   | 4.15 ±0.22                |                     | 1.01            | ±0.25                 |
| liwa/40b/26   | 4.95 ±0.26                |                     | 0.94            | ±0.30                 |
| liwa/40b/26   | 4.81 ±0.34                |                     | 0.97            | ±0.37                 |
| liwa/40b/26   | 3.69 ±0.16                |                     | 0.98            | ±0.20                 |
| liwa/40b/26   | 4.37 ±0.14                |                     | 1.06            | ±0.19                 |
| liwa/40b/26   | 4.37 ±0.12                |                     | 1.04            | ±0.18                 |
| liwa/40b/26   | 5.79 ±0.14                |                     | 0.89            | ±0.22                 |
| liwa/40b/26   | 4.85 ±0.12                |                     | 0.94            | ±0.19                 |

| <i>Sample</i> | <i>D<sub>e</sub></i> (Gy) | Error (random) (Gy) | Recycling ratio | Error (combined) (Gy) |
|---------------|---------------------------|---------------------|-----------------|-----------------------|
| liwa/40/28    | 4.37 ±0.14                |                     | 1.09            | ±0.19                 |
| liwa/40/28    | 4.33 ±0.16                |                     | 0.96            | ±0.21                 |
| liwa/40/28    | 4.20 ±0.16                |                     | 0.91            | ±0.20                 |
| liwa/40/28    | 3.65 ±0.09                |                     | 1.04            | ±0.14                 |
| liwa/40/28    | 3.51 ±0.10                |                     | 0.96            | ±0.15                 |
| liwa/40/28    | 4.26 ±0.13                |                     | 0.97            | ±0.18                 |
| liwa/40/28    | 4.73 ±0.19                |                     | 1.06            | ±0.24                 |

| <i>Sample</i> | <i>D<sub>e</sub></i> (Gy) | Error (random) (Gy) | Recycling ratio | Error (combined) (Gy) |
|---------------|---------------------------|---------------------|-----------------|-----------------------|
| liwa/40b/30   | 4.93 ±0.25                |                     | 1.06            | ±0.29                 |

|             |            |      |       |
|-------------|------------|------|-------|
| liwa/40b/30 | 4.31 ±0.33 | 1.04 | ±0.36 |
| liwa/40b/30 | 3.68 ±0.30 | 0.89 | ±0.32 |
| liwa/40b/30 | 4.33 ±0.31 | 0.89 | ±0.33 |
| liwa/40b/30 | 3.77 ±0.23 | 1.07 | ±0.26 |
| liwa/40b/30 | 3.65 ±0.20 | 1.01 | ±0.23 |
| liwa/40b/30 | 4.37 ±0.17 | 0.94 | ±0.21 |
| liwa/40b/30 | 4.17 ±0.15 | 0.97 | ±0.20 |
| liwa/40b/30 | 5.02 ±0.14 | 0.98 | ±0.20 |
| liwa/40b/30 | 4.53 ±0.18 | 1.06 | ±0.23 |

| <i>Sample</i> | <i>D<sub>e</sub></i> (Gy) | Error (random) (Gy) | Recycling ratio | Error (combined) (Gy) |
|---------------|---------------------------|---------------------|-----------------|-----------------------|
| liwa/40/32    | 4.36 ±0.11                |                     | 1.00            | ±0.17                 |
| liwa/40/32    | 5.15 ±0.17                |                     | 1.02            | ±0.23                 |
| liwa/40/32    | 4.76 ±0.17                |                     | 1.08            | ±0.22                 |
| liwa/40/32    | 5.37 ±0.16                |                     | 0.97            | ±0.22                 |
| liwa/40/32    | 4.84 ±0.21                |                     | 1.03            | ±0.26                 |
| liwa/40/32    | 4.57 ±0.13                |                     | 0.95            | ±0.19                 |

| <i>Sample</i> | <i>D<sub>e</sub></i> (Gy) | Error (random) (Gy) | Recycling ratio | Error (combined) (Gy) |
|---------------|---------------------------|---------------------|-----------------|-----------------------|
| liwa/40/36    | 3.31 ±0.08                |                     | 1.94            | ±0.13                 |
| liwa/40/36    | 3.72 ±0.09                |                     | 1.70            | ±0.15                 |
| liwa/40/36    | 2.72 ±0.08                |                     | 2.10            | ±0.11                 |
| liwa/40/36    | 4.87 ±0.14                |                     | 1.97            | ±0.20                 |
| liwa/40/36    | 3.59 ±0.11                |                     | 1.90            | ±0.15                 |
| liwa/40/36    | 3.67 ±0.11                |                     | 1.73            | ±0.16                 |
| liwa/40/36    | 3.18 ±0.10                |                     | 1.89            | ±0.14                 |
| liwa/40/36    | 4.24 ±0.14                |                     | 1.75            | ±0.19                 |
| liwa/40/36    | 4.44 ±0.12                |                     | 1.91            | ±0.18                 |

| <i>Sample</i> | <i>D<sub>e</sub></i> (Gy) | Error (random) (Gy) | Recycling ratio | Error (combined) (Gy) |
|---------------|---------------------------|---------------------|-----------------|-----------------------|
| liwa/40b/38   | 5.42 ±0.31                |                     | 1.06            | ±0.35                 |
| liwa/40b/38   | 4.36 ±0.26                |                     | 0.96            | ±0.29                 |
| liwa/40b/38   | 4.57 ±0.29                |                     | 1.08            | ±0.32                 |
| liwa/40b/38   | 4.40 ±0.28                |                     | 0.96            | ±0.31                 |
| liwa/40b/38   | 4.60 ±0.23                |                     | 1.00            | ±0.27                 |
| liwa/40b/38   | 5.14 ±0.30                |                     | 0.91            | ±0.34                 |
| liwa/40b/38   | 5.01 ±0.14                |                     | 0.91            | ±0.20                 |
| liwa/40b/38   | 4.69 ±0.15                |                     | 0.93            | ±0.21                 |
| liwa/40b/38   | 4.64 ±0.18                |                     | 1.01            | ±0.23                 |
| liwa/40b/38   | 2.86 ±0.11                |                     | 1.04            | ±0.14                 |

| <i>Sample</i> | <i>D<sub>e</sub></i> (Gy) | Error (random) (Gy) | Recycling ratio | Error (combined) (Gy) |
|---------------|---------------------------|---------------------|-----------------|-----------------------|
| liwa/40/40    | 4.12 ±0.15                |                     | 1.67            | ±0.19                 |
| liwa/40/40    | 3.33 ±0.15                |                     | 1.87            | ±0.18                 |
| liwa/40/40    | 3.43 ±0.12                |                     | 2.27            | ±0.16                 |
| liwa/40/40    | 3.74 ±0.12                |                     | 1.93            | ±0.17                 |
| liwa/40/40    | 3.01 ±0.09                |                     | 1.83            | ±0.13                 |

|            |            |      |       |
|------------|------------|------|-------|
| liwa/40/40 | 4.00 ±0.12 | 1.87 | ±0.17 |
| liwa/40/40 | 3.46 ±0.10 | 1.88 | ±0.15 |
| liwa/40/40 | 3.51 ±0.11 | 1.81 | ±0.15 |
| liwa/40/40 | 3.45 ±0.11 | 2.03 | ±0.15 |

| <i>Sample</i> | <i>D<sub>e</sub></i> (Gy) | Error (random) (Gy) | Recycling ratio | Error (combined) (Gy) |
|---------------|---------------------------|---------------------|-----------------|-----------------------|
| liwa/40b/42   | 4.37 ±0.51                |                     | 1.14            | ±0.53                 |
| liwa/40b/42   | 4.27 ±0.28                |                     | 0.99            | ±0.30                 |
| liwa/40b/42   | 4.48 ±0.30                |                     | 1.00            | ±0.32                 |
| liwa/40b/42   | 3.28 ±0.20                |                     | 0.98            | ±0.22                 |
| liwa/40b/42   | 3.34 ±0.20                |                     | 0.99            | ±0.22                 |
| liwa/40b/42   | 2.35 ±0.11                |                     | 0.99            | ±0.13                 |
| liwa/40b/42   | 4.32 ±0.17                |                     | 0.91            | ±0.21                 |
| liwa/40b/42   | 5.83 ±0.15                |                     | 0.93            | ±0.23                 |
| liwa/40b/42   | 3.67 ±0.11                |                     | 1.01            | ±0.15                 |
| liwa/40b/42   | 3.96 ±0.11                |                     | 1.04            | ±0.16                 |

| <i>Sample</i> | <i>D<sub>e</sub></i> (Gy) | Error (random) (Gy) | Recycling ratio | Error (combined) (Gy) |
|---------------|---------------------------|---------------------|-----------------|-----------------------|
| liwa/40/44    | 3.78 ±0.10                |                     | 1.92            | ±0.15                 |
| liwa/40/44    | 3.25 ±0.11                |                     | 1.82            | ±0.15                 |
| liwa/40/44    | 3.80 ±0.12                |                     | 1.73            | ±0.17                 |
| liwa/40/44    | 3.43 ±0.12                |                     | 1.85            | ±0.16                 |
| liwa/40/44    | 4.15 ±0.15                |                     | 2.11            | ±0.19                 |
| liwa/40/44    | 3.16 ±0.12                |                     | 1.94            | ±0.15                 |
| liwa/40/44    | 2.99 ±0.15                |                     | 1.84            | ±0.17                 |
| liwa/40/44    | 4.07 ±0.14                |                     | 1.67            | ±0.19                 |
| liwa/40/44    | 3.43 ±0.09                |                     | 1.81            | ±0.14                 |

| <i>Sample</i> | <i>D<sub>e</sub></i> (Gy) | Error (random) (Gy) | Recycling ratio | Error (combined) (Gy) |
|---------------|---------------------------|---------------------|-----------------|-----------------------|
| liwa/40b/48   | 4.51 ±0.31                |                     | 1.11            | ±0.34                 |
| liwa/40b/48   | 4.92 ±0.31                |                     | 0.99            | ±0.34                 |
| liwa/40b/48   | 4.42 ±0.32                |                     | 1.03            | ±0.35                 |
| liwa/40b/48   | 5.66 ±0.32                |                     | 0.98            | ±0.36                 |
| liwa/40b/48   | 5.38 ±0.32                |                     | 1.16            | ±0.35                 |
| liwa/40b/48   | 4.86 ±0.24                |                     | 0.90            | ±0.28                 |
| liwa/40b/48   | 4.85 ±0.12                |                     | 1.01            | ±0.19                 |
| liwa/40b/48   | 4.46 ±0.12                |                     | 0.94            | ±0.18                 |
| liwa/40b/48   | 5.60 ±0.14                |                     | 1.02            | ±0.22                 |
| liwa/40b/48   | 4.79 ±0.12                |                     | 0.98            | ±0.19                 |

| <i>Sample</i> | <i>D<sub>e</sub></i> (Gy) | Error (random) (Gy) | Recycling ratio | Error (combined) (Gy) |
|---------------|---------------------------|---------------------|-----------------|-----------------------|
| liwa/40/52    | 6.88 ±0.23                |                     | 1.05            | ±0.31                 |
| liwa/40/52    | 13.92 ±0.32               |                     | 1.00            | ±0.52                 |
| liwa/40/52    | 7.66 ±0.25                |                     | 0.90            | ±0.34                 |
| liwa/40/52    | 5.61 ±0.23                |                     | 1.01            | ±0.28                 |
| liwa/40/52    | 9.85 ±0.32                |                     | 0.97            | ±0.44                 |
| liwa/40/52    | 9.29 ±0.31                |                     | 0.92            | ±0.42                 |



|            |             |      |       |
|------------|-------------|------|-------|
| liwa/40/52 | 3.82 ±0.11  | 1.00 | ±0.16 |
| liwa/40/52 | 3.32 ±0.09  | 0.98 | ±0.13 |
| liwa/40/52 | 5.54 ±0.20  | 0.97 | ±0.26 |
| liwa/40/52 | 4.33 ±0.16  | 0.98 | ±0.20 |
| liwa/40/52 | 5.74 ±0.25  | 0.93 | ±0.30 |
| liwa/40/52 | 5.86 ±0.27  | 0.99 | ±0.32 |
| liwa/40/52 | 6.54 ±0.27  | 0.89 | ±0.33 |
| liwa/40/52 | 7.24 ±0.23  | 1.05 | ±0.32 |
| liwa/40/52 | 7.36 ±0.37  | 1.07 | ±0.43 |
| liwa/40/52 | 7.78 ±0.35  | 0.93 | ±0.42 |
| liwa/40/52 | 15.33 ±0.58 | 1.04 | ±0.74 |
| liwa/40/52 | 34.28 ±1.24 | 0.97 | ±1.61 |
| liwa/40/52 | 4.25 ±0.14  | 0.93 | ±0.19 |
| liwa/40/52 | 3.97 ±0.09  | 0.98 | ±0.15 |
| liwa/40/52 | 4.25 ±0.19  | 1.05 | ±0.23 |
| liwa/40/52 | 5.67 ±0.17  | 0.94 | ±0.24 |
| liwa/40/52 | 8.64 ±0.15  | 1.05 | ±0.30 |
| liwa/40/52 | 5.86 ±0.07  | 1.00 | ±0.19 |
| liwa/40/52 | 4.39 ±0.09  | 1.17 | ±0.16 |

| <i>Sample</i> | <i>D<sub>e</sub></i> (Gy) | Error<br>(random)<br>(Gy) | Recycling ratio | Error<br>(combined)<br>(Gy) |
|---------------|---------------------------|---------------------------|-----------------|-----------------------------|
| liwa/40b/54   | 4.97 ±0.32                |                           | 0.98            | ±0.36                       |
| liwa/40b/54   | 5.80 ±0.32                |                           | 0.91            | ±0.36                       |
| liwa/40b/54   | 4.38 ±0.26                |                           | 1.05            | ±0.29                       |
| liwa/40b/54   | 4.49 ±0.30                |                           | 1.01            | ±0.33                       |
| liwa/40b/54   | 4.24 ±0.27                |                           | 0.94            | ±0.30                       |
| liwa/40b/54   | 4.56 ±0.26                |                           | 1.02            | ±0.29                       |
| liwa/40b/54   | 4.40 ±0.18                |                           | 0.98            | ±0.23                       |
| liwa/40b/54   | 4.04 ±0.26                |                           | 0.99            | ±0.29                       |
| liwa/40b/54   | 4.94 ±0.27                |                           | 0.99            | ±0.30                       |
| liwa/40b/54   | 5.49 ±0.25                |                           | 0.91            | ±0.30                       |

| <i>Sample</i> | <i>D<sub>e</sub></i> (Gy) | Error<br>(random)<br>(Gy) | Recycling ratio | Error<br>(combined)<br>(Gy) |
|---------------|---------------------------|---------------------------|-----------------|-----------------------------|
| liwa/40/56    | 5.27 ±0.18                |                           | 1.67            | ±0.24                       |
| liwa/40/56    | 3.26 ±0.13                |                           | 1.94            | ±0.16                       |
| liwa/40/56    | 4.50 ±0.15                |                           | 2.07            | ±0.20                       |
| liwa/40/56    | 4.59 ±0.16                |                           | 1.81            | ±0.21                       |
| liwa/40/56    | 2.66 ±0.12                |                           | 2.03            | ±0.14                       |
| liwa/40/56    | 6.33 ±0.19                |                           | 1.76            | ±0.27                       |
| liwa/40/56    | 4.42 ±0.15                |                           | 2.11            | ±0.20                       |
| liwa/40/56    | 5.71 ±0.15                |                           | 1.81            | ±0.23                       |
| liwa/40/56    | 3.70 ±0.14                |                           | 1.75            | ±0.18                       |
| liwa/40/56    | 4.66 ±0.17                |                           | 1.07            | ±0.22                       |
| liwa/40/56    | 5.91 ±0.31                |                           | 1.08            | ±0.36                       |
| liwa/40/56    | 6.03 ±0.22                |                           | 0.87            | ±0.28                       |
| liwa/40/56    | 6.68 ±0.31                |                           | 0.94            | ±0.37                       |
| liwa/40/56    | 6.71 ±0.32                |                           | 0.97            | ±0.38                       |
| liwa/40/56    | 6.73 ±0.28                |                           | 0.98            | ±0.35                       |
| liwa/40/56    | 6.77 ±0.26                |                           | 0.94            | ±0.33                       |

|            |            |      |       |
|------------|------------|------|-------|
| liwa/40/56 | 7.18 ±0.33 | 0.97 | ±0.39 |
| liwa/40/56 | 7.66 ±0.30 | 0.98 | ±0.38 |
| liwa/40/56 | 7.73 ±0.27 | 1.01 | ±0.36 |
| liwa/40/56 | 6.89 ±0.06 | 1.04 | ±0.22 |
| liwa/40/56 | 6.10 ±0.14 | 1.10 | ±0.23 |
| liwa/40/56 | 6.42 ±0.40 | 0.98 | ±0.44 |
| liwa/40/56 | 5.68 ±0.12 | 1.01 | ±0.21 |
| liwa/40/56 | 5.21 ±0.16 | 1.09 | ±0.22 |
| liwa/40/56 | 6.42 ±0.11 | 1.02 | ±0.22 |
| liwa/40/56 | 6.67 ±0.06 | 1.04 | ±0.21 |

| <i>Sample</i> | <i>D<sub>e</sub></i> (Gy) | Error<br>(random)<br>(Gy) | Recycling ratio | Error<br>(combined)<br>(Gy) |
|---------------|---------------------------|---------------------------|-----------------|-----------------------------|
| liwa/40b/59   | 5.38 ±0.37                |                           | 1.06            | ±0.41                       |
| liwa/40b/59   | 6.61 ±0.42                |                           | 1.06            | ±0.47                       |
| liwa/40b/59   | 6.56 ±0.32                |                           | 0.94            | ±0.37                       |
| liwa/40b/59   | 6.71 ±0.38                |                           | 0.89            | ±0.43                       |
| liwa/40b/59   | 6.09 ±0.54                |                           | 1.01            | ±0.57                       |
| liwa/40b/59   | 5.13 ±0.34                |                           | 1.01            | ±0.37                       |
| liwa/40b/59   | 6.03 ±0.17                |                           | 1.06            | ±0.25                       |
| liwa/40b/59   | 5.18 ±0.25                |                           | 1.04            | ±0.29                       |
| liwa/40b/59   | 5.74 ±0.34                |                           | 0.89            | ±0.39                       |
| liwa/40b/59   | 5.44 ±0.30                |                           | 0.94            | ±0.34                       |

| <i>Sample</i> | <i>D<sub>e</sub></i> (Gy) | Error<br>(random)<br>(Gy) | Recycling ratio | Error<br>(combined)<br>(Gy) |
|---------------|---------------------------|---------------------------|-----------------|-----------------------------|
| liwa/40/60    | 6.95 ±0.22                |                           | 1.03            | ±0.30                       |
| liwa/40/60    | 4.55 ±0.17                |                           | 1.00            | ±0.22                       |
| liwa/40/60    | 6.46 ±0.20                |                           | 1.03            | ±0.28                       |
| liwa/40/60    | 4.84 ±0.15                |                           | 1.06            | ±0.21                       |
| liwa/40/60    | 4.46 ±0.17                |                           | 1.04            | ±0.21                       |
| liwa/40/60    | 5.08 ±0.17                |                           | 0.95            | ±0.23                       |
| liwa/40/60    | 5.88 ±0.22                |                           | 1.07            | ±0.28                       |
| liwa/40/60    | 6.36 ±0.25                |                           | 1.08            | ±0.31                       |
| liwa/40/60    | 6.45 ±0.30                |                           | 0.87            | ±0.36                       |
| liwa/40/60    | 6.72 ±0.24                |                           | 0.94            | ±0.31                       |
| liwa/40/60    | 5.98 ±0.39                |                           | 0.97            | ±0.43                       |
| liwa/40/60    | 7.21 ±0.44                |                           | 0.98            | ±0.49                       |
| liwa/40/60    | 6.31 ±0.04                |                           | 1.03            | ±0.19                       |
| liwa/40/60    | 5.07 ±0.04                |                           | 1.07            | ±0.16                       |
| liwa/40/60    | 7.34 ±0.27                |                           | 1.10            | ±0.35                       |
| liwa/40/60    | 7.12 ±0.30                |                           | 1.07            | ±0.37                       |
| liwa/40/60    | 6.55 ±0.50                |                           | 0.96            | ±0.53                       |
| liwa/40/60    | 5.82 ±0.08                |                           | 1.00            | ±0.19                       |
| liwa/40/60    | 6.21 ±0.15                |                           | 0.99            | ±0.24                       |

| <i>Sample</i> | <i>D<sub>e</sub></i> (Gy) | Error<br>(random)<br>(Gy) | Recycling ratio | Error<br>(combined)<br>(Gy) |
|---------------|---------------------------|---------------------------|-----------------|-----------------------------|
| liwa/40b/64   | 7.36 ±0.46                |                           | 0.89            | ±0.51                       |
| liwa/40b/64   | 7.30 ±0.41                |                           | 0.93            | ±0.47                       |
| liwa/40b/64   | 7.01 ±0.64                |                           | 0.82            | ±0.67                       |

|             |            |      |       |
|-------------|------------|------|-------|
| liwa/40b/64 | 6.30 ±0.52 | 1.07 | ±0.55 |
| liwa/40b/64 | 6.44 ±0.56 | 1.08 | ±0.60 |
| liwa/40b/64 | 6.16 ±0.44 | 0.87 | ±0.48 |
| liwa/40b/64 | 7.64 ±0.33 | 0.94 | ±0.40 |
| liwa/40b/64 | 7.45 ±0.28 | 0.97 | ±0.36 |
| liwa/40b/64 | 7.17 ±0.33 | 0.98 | ±0.40 |
| liwa/40b/64 | 8.38 ±0.37 | 1.06 | ±0.45 |

  

| <i>Sample</i> | <i>D<sub>e</sub></i> (Gy) | Error<br>(random)<br>(Gy) | Recycling ratio | Error<br>(combined)<br>(Gy) |
|---------------|---------------------------|---------------------------|-----------------|-----------------------------|
| liwa/40b/67   | 7.14 ±0.41                |                           | 1.01            | ±0.46                       |
| liwa/40b/67   | 6.91 ±0.34                |                           | 0.92            | ±0.40                       |
| liwa/40b/67   | 6.86 ±0.52                |                           | 1.06            | ±0.56                       |
| liwa/40b/67   | 6.86 ±0.36                |                           | 1.03            | ±0.41                       |
| liwa/40b/67   | 8.91 ±0.49                |                           | 1.06            | ±0.56                       |
| liwa/40b/67   | 8.71 ±0.46                |                           | 1.00            | ±0.53                       |
| liwa/40b/67   | 6.68 ±0.37                |                           | 0.93            | ±0.42                       |
| liwa/40b/67   | 6.72 ±0.43                |                           | 0.82            | ±0.48                       |
| liwa/40b/67   | 7.30 ±0.50                |                           | 1.07            | ±0.55                       |
| liwa/40b/67   | 7.57 ±0.53                |                           | 1.07            | ±0.58                       |

  

| <i>Sample</i> | <i>D<sub>e</sub></i> (Gy) | Error<br>(random)<br>(Gy) | Recycling ratio | Error<br>(combined)<br>(Gy) |
|---------------|---------------------------|---------------------------|-----------------|-----------------------------|
| liwa/40b/72   | 9.31 ±0.57                |                           | 1.05            | ±0.64                       |
| liwa/40b/72   | 7.23 ±0.45                |                           | 1.08            | ±0.50                       |
| liwa/40b/72   | 8.18 ±0.32                |                           | 0.91            | ±0.40                       |
| liwa/40b/72   | 8.77 ±0.55                |                           | 0.93            | ±0.61                       |
| liwa/40b/72   | 11.37 ±0.77               |                           | 1.01            | ±0.84                       |
| liwa/40b/72   | 8.39 ±0.74                |                           | 1.04            | ±0.78                       |
| liwa/40b/72   | 6.17 ±0.24                |                           | 1.08            | ±0.30                       |
| liwa/40b/72   | 6.40 ±0.58                |                           | 0.91            | ±0.62                       |
| liwa/40b/72   | 6.76 ±0.46                |                           | 0.93            | ±0.51                       |
| liwa/40b/72   | 8.11 ±0.69                |                           | 1.03            | ±0.73                       |

  

| <i>Sample</i> | <i>D<sub>e</sub></i> (Gy) | Error<br>(random)<br>(Gy) | Recycling ratio | Error<br>(combined)<br>(Gy) |
|---------------|---------------------------|---------------------------|-----------------|-----------------------------|
| liwa/40/80    | 54.48 ±1.44               |                           | 1.03            | ±2.18                       |
| liwa/40/80    | 91.62 ±2.44               |                           | 0.95            | ±3.67                       |
| liwa/40/80    | 64.15 ±1.70               |                           | 0.98            | ±2.57                       |
| liwa/40/80    | 78.44 ±2.37               |                           | 0.95            | ±3.34                       |
| liwa/40/80    | 22.14 ±0.76               |                           | 1.02            | ±1.01                       |
| liwa/40/80    | 58.04 ±1.60               |                           | 0.91            | ±2.36                       |
| liwa/40/80    | 17.73 ±0.59               |                           | 1.05            | ±0.79                       |
| liwa/40/80    | 41.98 ±1.17               |                           | 0.97            | ±1.72                       |
| liwa/40/80    | 25.36 ±0.65               |                           | 0.93            | ±1.00                       |
| liwa/40/80    | 19.84 ±0.28               |                           | 0.95            | ±0.66                       |
| liwa/40/80    | 20.24 ±0.42               |                           | 0.98            | ±0.74                       |
| liwa/40/80    | 22.06 ±0.38               |                           | 0.95            | ±0.76                       |
| liwa/40/80    | 24.70 ±0.46               |                           | 1.02            | ±0.87                       |
| liwa/40/80    | 48.48 ±0.77               |                           | 0.91            | ±1.65                       |
| liwa/40/80    | 58.99 ±1.16               |                           | 0.95            | ±2.12                       |

|            |              |      |       |
|------------|--------------|------|-------|
| liwa/40/80 | 60.84 ±1.15  | 0.98 | ±2.16 |
| liwa/40/80 | 68.51 ±1.05  | 0.95 | ±2.31 |
| liwa/40/80 | 118.68 ±1.55 | 1.02 | ±3.88 |
| liwa/40/80 | 16.50 ±0.28  | 0.91 | ±0.57 |
| liwa/40/80 | 31.12 ±0.38  | 1.03 | ±1.01 |
| liwa/40/80 | 32.52 ±1.47  | 1.05 | ±1.77 |
| liwa/40/80 | 23.94 ±1.27  | 1.05 | ±1.46 |
| liwa/40/80 | 42.90 ±1.56  | 1.08 | ±2.02 |
| liwa/40/80 | 60.14 ±1.35  | 1.05 | ±2.25 |

| <i>Sample</i> | <i>D<sub>e</sub> (Gy)</i> | Error<br>(random)<br>(Gy) | Recycling ratio | Error<br>(combined)<br>(Gy) |
|---------------|---------------------------|---------------------------|-----------------|-----------------------------|
| liwa/40/87.5  | 296.53 ±7.33              |                           | 1.03            | ±11.53                      |
| liwa/40/87.5  | 619.43 ±15.81             |                           | 0.95            | ±24.40                      |
| liwa/40/87.5  | 321.83 ±6.11              |                           | 1.01            | ±11.43                      |
| liwa/40/87.5  | 236.22 ±5.36              |                           | 0.92            | ±8.89                       |
| liwa/40/87.5  | 421.51 ±7.53              |                           | 1.02            | ±14.72                      |
| liwa/40/87.5  | 500.88 ±13.11             |                           | 0.92            | ±19.94                      |
| liwa/40/87.5  | 778.12 ±15.97             |                           | 1.06            | ±28.29                      |
| liwa/40/87.5  | 161.87 ±3.52              |                           | 0.97            | ±6.00                       |
| liwa/40/87.5  | 172.03 ±3.75              |                           | 0.95            | ±6.38                       |
| liwa/40/87.5  | 178.42 ±2.73              |                           | 0.98            | ±6.01                       |
| liwa/40/87.5  | 185.43 ±4.40              |                           | 0.95            | ±7.09                       |
| liwa/40/87.5  | 191.79 ±4.46              |                           | 1.02            | ±7.28                       |
| liwa/40/87.5  | 249.94 ±5.15              |                           | 0.91            | ±9.10                       |
| liwa/40/87.5  | 276.89 ±5.86              |                           | 1.11            | ±10.17                      |
| liwa/40/87.5  | 285.30 ±6.27              |                           | 1.03            | ±10.61                      |
| liwa/40/87.5  | 487.88 ±12.50             |                           | 0.97            | ±19.25                      |
| liwa/40/87.5  | 214.27 ±3.65              |                           | 1.01            | ±7.39                       |
| liwa/40/87.5  | 317.74 ±32.61             |                           | 1.01            | ±33.97                      |
| liwa/40/87.5  | 320.14 ±7.14              |                           | 1.04            | ±11.97                      |
| liwa/40/87.5  | 597.16 ±41.41             |                           | 1.03            | ±45.12                      |
| liwa/40/87.5  | 232.42 ±13.56             |                           | 1.05            | ±15.25                      |
| liwa/40/87.5  | 231.04 ±9.31              |                           | 1.02            | ±11.61                      |
| liwa/40/87.5  | 224.09 ±9.14              |                           | 0.99            | ±11.35                      |
| liwa/40/87.5  | 251.62 ±6.66              |                           | 1.06            | ±10.07                      |
| liwa/40/87.5  | 263.53 ±20.04             |                           | 1.01            | ±21.55                      |
| liwa/40/87.5  | 279.77 ±137.97            |                           | 1.03            | ±138.23                     |
| liwa/40/87.5  | 200.93 ±11.04             |                           | 1.03            | ±12.58                      |
| liwa/40/87.5  | 245.01 ±5.80              |                           | 1.03            | ±9.37                       |
| liwa/40/87.5  | 418.65 ±24.43             |                           | 1.02            | ±27.47                      |
| liwa/40/87.5  | 474.38 ±245.73            |                           | 0.98            | ±246.14                     |
| liwa/40/87.5  | 338.63 ±3.84              |                           | 1.00            | ±10.86                      |
| liwa/40/87.5  | 210.54 ±3.69              |                           | 1.04            | ±7.32                       |
| liwa/40/87.5  | 252.42 ±4.25              |                           | 1.00            | ±8.68                       |
| liwa/40/87.5  | 313.42 ±3.85              |                           | 1.00            | ±10.16                      |
| liwa/40/87.5  | 553.27 ±6.51              |                           | 1.03            | ±17.83                      |
| liwa/40/87.5  | 189.03 ±1.96              |                           | 1.02            | ±6.00                       |
| liwa/40/87.5  | 195.13 ±3.19              |                           | 0.96            | ±6.66                       |
| liwa/40/87.5  | 198.88 ±3.42              |                           | 1.03            | ±6.88                       |

| <i>Sample</i> | $D_e$ (Gy)    | Error<br>(random)<br>(Gy) | Recycling ratio | Error<br>(combined)<br>(Gy) |
|---------------|---------------|---------------------------|-----------------|-----------------------------|
| liwa/40/90    | 261.43 ±5.59  |                           | 0.97            | ±9.63                       |
| liwa/40/90    | 559.73 ±13.81 |                           | 1.04            | ±21.74                      |
| liwa/40/90    | 354.22 ±7.37  |                           | 0.97            | ±12.93                      |
| liwa/40/90    | 312.60 ±5.71  |                           | 1.02            | ±10.98                      |
| liwa/40/90    | 247.44 ±5.37  |                           | 1.03            | ±9.16                       |
| liwa/40/90    | 500.67 ±9.95  |                           | 0.98            | ±18.01                      |
| liwa/40/90    | 200.70 ±4.85  |                           | 0.99            | ±7.73                       |
| liwa/40/90    | 233.62 ±5.17  |                           | 1.00            | ±8.71                       |
| liwa/40/90    | 213.18 ±5.09  |                           | 0.97            | ±8.17                       |
| liwa/40/90    | 176.32 ±5.17  |                           | 1.10            | ±7.40                       |
| liwa/40/90    | 187.42 ±5.39  |                           | 1.01            | ±7.79                       |
| liwa/40/90    | 208.50 ±4.45  |                           | 1.05            | ±7.68                       |
| liwa/40/90    | 213.30 ±5.28  |                           | 1.08            | ±8.30                       |
| liwa/40/90    | 217.88 ±5.96  |                           | 1.09            | ±8.85                       |
| liwa/40/90    | 232.63 ±5.09  |                           | 0.95            | ±8.64                       |
| liwa/40/90    | 314.23 ±8.35  |                           | 1.00            | ±12.59                      |
| liwa/40/90    | 326.07 ±7.56  |                           | 0.98            | ±12.36                      |
| liwa/40/90    | 388.74 ±8.77  |                           | 0.97            | ±14.59                      |
| liwa/40/90    | 263.53 ±52.48 |                           | 0.96            | ±53.07                      |
| liwa/40/90    | 180.73 ±9.11  |                           | 0.94            | ±10.60                      |
| liwa/40/90    | 236.24 ±13.38 |                           | 1.03            | ±15.14                      |
| liwa/40/90    | 201.85 ±7.59  |                           | 1.10            | ±9.71                       |
| liwa/40/90    | 163.00 ±6.24  |                           | 1.01            | ±7.93                       |
| liwa/40/90    | 186.98 ±18.78 |                           | 1.05            | ±19.60                      |
| liwa/40/90    | 237.56 ±6.91  |                           | 1.08            | ±9.93                       |
| liwa/40/90    | 300.59 ±31.26 |                           | 1.09            | ±32.54                      |
| liwa/40/90    | 170.09 ±3.33  |                           | 0.95            | ±6.10                       |
| liwa/40/90    | 131.00 ±2.88  |                           | 0.96            | ±4.87                       |
| liwa/40/90    | 176.98 ±3.60  |                           | 0.93            | ±6.42                       |
| liwa/40/90    | 160.31 ±3.91  |                           | 0.97            | ±6.20                       |
| liwa/40/90    | 132.11 ±4.73  |                           | 0.96            | ±6.17                       |
| liwa/40/90    | 122.89 ±3.52  |                           | 0.99            | ±5.10                       |
| liwa/40/90    | 176.19 ±1.58  |                           | 0.89            | ±5.52                       |
| liwa/40/90    | 243.39 ±6.85  |                           | 0.97            | ±10.01                      |

| <i>Sample</i> | $D_e$ (Gy)   | Error<br>(random)<br>(Gy) | Recycling ratio | Error<br>(combined)<br>(Gy) |
|---------------|--------------|---------------------------|-----------------|-----------------------------|
| liwa/24/121   | 231.96 ±3.07 |                           | 1.05            | ±7.61                       |
| liwa/24/121   | 295.74 ±3.66 |                           | 1.04            | ±9.60                       |
| liwa/24/121   | 385.99 ±5.22 |                           | 1.03            | ±12.70                      |
| liwa/24/121   | 239.77 ±3.40 |                           | 0.95            | ±7.96                       |
| liwa/24/121   | 269.84 ±4.31 |                           | 0.95            | ±9.17                       |
| liwa/24/121   | 360.58 ±5.52 |                           | 1.03            | ±12.15                      |
| liwa/24/121   | 351.72 ±4.06 |                           | 1.01            | ±11.31                      |
| liwa/24/121   | 435.41 ±5.37 |                           | 1.02            | ±14.12                      |
| liwa/24/121   | 190.54 ±2.74 |                           | 0.99            | ±6.34                       |
| liwa/24/121   | 153.90 ±2.75 |                           | 1.03            | ±5.37                       |
| liwa/24/121   | 158.86 ±2.48 |                           | 1.05            | ±5.37                       |

|             |               |      |        |
|-------------|---------------|------|--------|
| liwa/24/121 | 200.45 ±2.91  | 1.03 | ±6.68  |
| liwa/24/121 | 222.29 ±3.42  | 1.01 | ±7.49  |
| liwa/24/121 | 250.15 ±3.21  | 1.01 | ±8.16  |
| liwa/24/121 | 252.56 ±3.33  | 0.95 | ±8.28  |
| liwa/24/121 | 360.93 ±4.61  | 1.03 | ±11.77 |
| liwa/24/121 | 417.99 ±4.92  | 1.05 | ±13.47 |
| liwa/24/121 | 259.77 ±6.97  | 1.03 | ±10.46 |
| liwa/24/121 | 235.81 ±9.62  | 1.01 | ±11.94 |
| liwa/24/121 | 283.95 ±17.32 | 1.01 | ±19.31 |
| liwa/24/121 | 193.42 ±8.76  | 0.95 | ±10.50 |
| liwa/24/121 | 159.69 ±2.67  | 1.05 | ±5.49  |
| liwa/24/121 | 150.65 ±4.54  | 1.03 | ±6.41  |
| liwa/24/121 | 307.12 ±22.76 | 1.01 | ±24.55 |
| liwa/24/121 | 196.67 ±5.12  | 1.01 | ±7.81  |
| liwa/24/121 | 295.61 ±2.71  | 0.95 | ±9.27  |
| liwa/24/121 | 210.79 ±1.84  | 0.95 | ±6.59  |
| liwa/24/121 | 174.09 ±1.36  | 0.94 | ±5.40  |
| liwa/24/121 | 142.43 ±1.18  | 0.94 | ±4.43  |
| liwa/24/121 | 123.49 ±1.01  | 0.94 | ±3.84  |
| liwa/24/121 | 116.10 ±1.31  | 0.95 | ±3.72  |
| liwa/24/121 | 238.30 ±1.72  | 0.93 | ±7.35  |
| liwa/24/121 | 151.48 ±1.42  | 0.94 | ±4.76  |

| <i>Sample</i> | <i>D<sub>e</sub></i> (Gy) | Error<br>(random)<br>(Gy) | Recycling ratio | Error<br>(combined)<br>(Gy) |
|---------------|---------------------------|---------------------------|-----------------|-----------------------------|
| liwa/47/2     | 0.45 ±0.03                |                           | 1.07            | ±0.03                       |
| liwa/47/2     | 0.51 ±0.06                |                           | 0.99            | ±0.06                       |
| liwa/47/2     | 0.87 ±0.09                |                           | 1.03            | ±0.09                       |
| liwa/47/2     | 0.90 ±0.06                |                           | 0.98            | ±0.07                       |
| liwa/47/2     | 0.96 ±0.09                |                           | 0.85            | ±0.09                       |
| liwa/47/2     | 1.79 ±0.12                |                           | 0.95            | ±0.13                       |
| liwa/47/2     | 2.24 ±0.08                |                           | 1.04            | ±0.10                       |
| liwa/47/2     | 0.60 ±0.04                |                           | 0.91            | ±0.04                       |
| liwa/47/2     | 1.29 ±0.04                |                           | 1.14            | ±0.05                       |
| liwa/47/2     | 2.72 ±0.10                |                           | 1.29            | ±0.13                       |
| liwa/47/2     | 0.92 ±0.05                |                           | 1.10            | ±0.05                       |
| liwa/47/2     | 0.37 ±0.03                |                           | 0.97            | ±0.03                       |
| liwa/47/2     | 1.00 ±0.04                |                           | 1.03            | ±0.05                       |
| liwa/47/2     | 0.92 ±0.03                |                           | 1.05            | ±0.04                       |
| liwa/47/2     | 0.42 ±0.02                |                           | 1.22            | ±0.02                       |

| <i>Sample</i> | <i>D<sub>e</sub></i> (Gy) | Error<br>(random)<br>(Gy) | Recycling ratio | Error<br>(combined)<br>(Gy) |
|---------------|---------------------------|---------------------------|-----------------|-----------------------------|
| liwa/47/13    | 12.69 ±0.25               |                           | 1.17            | ±0.46                       |
| liwa/47/13    | 13.11 ±0.18               |                           | 1.15            | ±0.43                       |
| liwa/47/13    | 16.97 ±0.27               |                           | 1.14            | ±0.58                       |
| liwa/47/13    | 27.93 ±0.84               |                           | 1.16            | ±1.19                       |
| liwa/47/13    | 29.13 ±0.86               |                           | 1.06            | ±1.22                       |
| liwa/47/13    | 33.69 ±0.36               |                           | 1.10            | ±1.07                       |
| liwa/47/13    | 32.13 ±2.51               |                           | 0.91            | ±2.69                       |
| liwa/47/13    | 8.38 ±0.29                |                           | 0.93            | ±0.38                       |

|            |             |      |       |
|------------|-------------|------|-------|
| liwa/47/13 | 21.92 ±1.01 | 0.96 | ±1.21 |
| liwa/47/13 | 19.64 ±0.89 | 0.98 | ±1.07 |
| liwa/47/13 | 20.16 ±0.84 | 0.89 | ±1.04 |
| liwa/47/13 | 11.09 ±0.20 | 0.93 | ±0.39 |
| liwa/47/13 | 32.80 ±1.91 | 0.93 | ±2.15 |
| liwa/47/13 | 13.48 ±0.44 | 0.91 | ±0.60 |

| <i>Sample</i> | <i>D<sub>e</sub></i> (Gy) | Error (random) (Gy) | Recycling ratio | Error (combined) (Gy) |
|---------------|---------------------------|---------------------|-----------------|-----------------------|
| liwa/47/33    | 232.50 ±7.93              |                     | 1.11            | ±10.56                |
| liwa/47/33    | 88.42 ±0.49               |                     | 1.06            | ±2.70                 |
| liwa/47/33    | 205.74 ±7.21              |                     | 1.07            | ±9.49                 |
| liwa/47/33    | 177.26 ±3.34              |                     | 1.06            | ±6.28                 |
| liwa/47/33    | 114.31 ±0.68              |                     | 1.06            | ±3.50                 |
| liwa/47/33    | 152.94 ±4.98              |                     | 1.07            | ±6.77                 |
| liwa/47/33    | 206.49 ±2.93              |                     | 1.00            | ±6.85                 |
| liwa/47/33    | 157.92 ±34.00             |                     | 1.00            | ±34.33                |

| <i>Sample</i> | <i>D<sub>e</sub></i> (Gy) | Error (random) (Gy) | Recycling ratio | Error (combined) (Gy) |
|---------------|---------------------------|---------------------|-----------------|-----------------------|
| liwa/47/56    | 224.40 ±3.73              |                     | 1.03            | ±7.70                 |
| liwa/47/56    | 211.73 ±2.10              |                     | 1.03            | ±6.69                 |
| liwa/47/56    | 171.46 ±0.55              |                     | 1.08            | ±5.17                 |
| liwa/47/56    | 248.86 ±8.01              |                     | 1.08            | ±10.95                |
| liwa/47/56    | 239.71 ±3.42              |                     | 1.05            | ±7.97                 |
| liwa/47/56    | 112.73 ±1.81              |                     | 1.04            | ±3.84                 |
| liwa/47/56    | 276.64 ±3.49              |                     | 0.95            | ±9.00                 |
| liwa/47/56    | 200.09 ±1.16              |                     | 1.07            | ±6.11                 |

| <i>Sample</i> | <i>D<sub>e</sub></i> (Gy) | Error (random) (Gy) | Recycling ratio | Error (combined) (Gy) |
|---------------|---------------------------|---------------------|-----------------|-----------------------|
| liwa/47/61    | 245.13 ±5.95              |                     | 1.00            | ±9.46                 |
| liwa/47/61    | 205.12 ±1.03              |                     | 1.02            | ±6.24                 |
| liwa/47/61    | 252.64 ±10.30             |                     | 1.05            | ±12.79                |
| liwa/47/61    | 253.56 ±1.79              |                     | 1.00            | ±7.81                 |
| liwa/47/61    | 239.74 ±4.62              |                     | 1.02            | ±8.55                 |
| liwa/47/61    | 222.93 ±6.55              |                     | 1.04            | ±9.36                 |
| liwa/47/61    | 235.19 ±6.32              |                     | 1.04            | ±9.47                 |
| liwa/47/61    | 240.59 ±0.44              |                     | 1.00            | ±7.23                 |

| <i>Sample</i> | <i>D<sub>e</sub></i> (Gy) | Error (random) (Gy) | Recycling ratio | Error (combined) (Gy) |
|---------------|---------------------------|---------------------|-----------------|-----------------------|
| liwa/47/64    | 309.85 ±8.50              |                     | 1.08            | ±12.60                |
| liwa/47/64    | 287.04 ±3.98              |                     | 1.06            | ±9.48                 |
| liwa/47/64    | 264.65 ±7.52              |                     | 1.08            | ±10.94                |
| liwa/47/64    | 313.09 ±2.72              |                     | 1.05            | ±9.78                 |
| liwa/47/64    | 374.22 ±8.85              |                     | 1.06            | ±14.29                |
| liwa/47/64    | 254.85 ±5.45              |                     | 1.11            | ±9.39                 |
| liwa/47/64    | 306.70 ±4.47              |                     | 1.07            | ±10.23                |
| liwa/47/64    | 364.59 ±9.34              |                     | 1.07            | ±14.38                |

| <i>Sample</i> | $D_e$ (Gy)   | Error<br>(random)<br>(Gy) | Recycling ratio | Error<br>(combined)<br>(Gy) |
|---------------|--------------|---------------------------|-----------------|-----------------------------|
| liwa/47/69    | 204.63 ±1.65 |                           | 1.04            | ±6.36                       |
| liwa/47/69    | 286.15 ±3.35 |                           | 1.05            | ±9.22                       |
| liwa/47/69    | 297.32 ±1.86 |                           | 1.05            | ±9.11                       |
| liwa/47/69    | 162.62 ±1.34 |                           | 1.03            | ±5.06                       |
| liwa/47/69    | 187.08 ±1.64 |                           | 1.08            | ±5.85                       |
| liwa/47/69    | 393.42 ±3.86 |                           | 1.10            | ±12.42                      |
| liwa/47/69    | 274.44 ±2.63 |                           | 1.06            | ±8.64                       |

| <i>Sample</i> | $D_e$ (Gy)    | Error<br>(random)<br>(Gy) | Recycling ratio | Error<br>(combined)<br>(Gy) |
|---------------|---------------|---------------------------|-----------------|-----------------------------|
| liwa/47/75    | 248.45 ±2.59  |                           | 1.04            | ±7.89                       |
| liwa/47/75    | 258.90 ±2.23  |                           | 1.06            | ±8.08                       |
| liwa/47/75    | 419.38 ±12.93 |                           | 1.03            | ±18.04                      |
| liwa/47/75    | 274.11 ±2.07  |                           | 1.08            | ±8.48                       |
| liwa/47/75    | 232.77 ±1.87  |                           | 1.10            | ±7.23                       |
| liwa/47/75    | 295.45 ±4.16  |                           | 1.05            | ±9.79                       |
| liwa/47/75    | 344.74 ±9.08  |                           | 1.06            | ±13.76                      |
| liwa/47/75    | 358.64 ±2.42  |                           | 1.07            | ±11.03                      |

| <i>Sample</i> | $D_e$ (Gy)    | Error<br>(random)<br>(Gy) | Recycling ratio | Error<br>(combined)<br>(Gy) |
|---------------|---------------|---------------------------|-----------------|-----------------------------|
| liwa/47/83    | 377.45 ±3.39  |                           | 1.04            | ±11.82                      |
| liwa/47/83    | 333.37 ±3.93  |                           | 1.08            | ±10.75                      |
| liwa/47/83    | 298.08 ±2.70  |                           | 1.13            | ±9.34                       |
| liwa/47/83    | 300.86 ±0.00  |                           | 1.06            | ±9.03                       |
| liwa/47/83    | 343.36 ±5.21  |                           | 1.09            | ±11.54                      |
| liwa/47/83    | 270.54 ±4.81  |                           | 1.06            | ±9.44                       |
| liwa/47/83    | 925.77 ±47.13 |                           | 1.15            | ±54.70                      |
| liwa/47/83    | 458.49 ±6.71  |                           | 1.06            | ±15.30                      |

| <i>Sample</i> | $D_e$ (Gy)   | Error<br>(random)<br>(Gy) | Recycling ratio | Error<br>(combined)<br>(Gy) |
|---------------|--------------|---------------------------|-----------------|-----------------------------|
| liwa/47/88    | 262.98 ±6.74 |                           | 1.08            | ±10.37                      |
| liwa/47/88    | 172.06 ±1.78 |                           | 1.06            | ±5.46                       |
| liwa/47/88    | 343.81 ±5.92 |                           | 1.10            | ±11.89                      |
| liwa/47/88    | 209.64 ±3.28 |                           | 1.06            | ±7.09                       |
| liwa/47/88    | 376.51 ±6.53 |                           | 1.06            | ±13.05                      |
| liwa/47/88    | 248.24 ±4.57 |                           | 1.04            | ±8.74                       |
| liwa/47/88    | 199.66 ±2.30 |                           | 1.08            | ±6.41                       |
| liwa/47/88    | 222.43 ±1.89 |                           | 1.07            | ±6.94                       |

| <i>Sample</i> | $D_e$ (Gy)   | Error<br>(random)<br>(Gy) | Recycling ratio | Error<br>(combined)<br>(Gy) |
|---------------|--------------|---------------------------|-----------------|-----------------------------|
| liwa/47/89    | 236.31 ±2.34 |                           | 1.03            | ±7.46                       |
| liwa/47/89    | 273.67 ±5.01 |                           | 1.12            | ±9.62                       |
| liwa/47/89    | 319.68 ±8.52 |                           | 1.07            | ±12.83                      |
| liwa/47/89    | 201.18 ±1.56 |                           | 1.08            | ±6.23                       |



|            |               |      |        |
|------------|---------------|------|--------|
| liwa/47/89 | 296.31 ±10.16 | 1.05 | ±13.50 |
| liwa/47/89 | 257.94 ±3.10  | 1.05 | ±8.34  |
| liwa/47/89 | 230.99 ±4.33  | 1.07 | ±8.17  |
| liwa/47/89 | 264.88 ±9.02  | 0.98 | ±12.02 |

| <i>Sample</i> | <i>D<sub>e</sub></i> (Gy) | Error (random) (Gy) | Recycling ratio | Error (combined) (Gy) |
|---------------|---------------------------|---------------------|-----------------|-----------------------|
| liwa/47/98    | 217.99 ±2.30              |                     | 0.98            | ±6.93                 |
| liwa/47/98    | 200.35 ±2.97              |                     | 1.07            | ±6.71                 |
| liwa/47/98    | 247.95 ±5.64              |                     | 1.06            | ±9.34                 |
| liwa/47/98    | 229.90 ±4.01              |                     | 1.02            | ±7.98                 |
| liwa/47/98    | 176.21 ±2.91              |                     | 1.00            | ±6.03                 |
| liwa/47/98    | 253.45 ±1.39              |                     | 1.04            | ±7.73                 |
| liwa/47/98    | 236.97 ±12.60             |                     | 0.99            | ±14.46                |

| <i>Sample</i> | <i>D<sub>e</sub></i> (Gy) | Error (random) (Gy) | Recycling ratio | Error (combined) (Gy) |
|---------------|---------------------------|---------------------|-----------------|-----------------------|
| liwa/47/100   | 382.58 ±2.12              |                     | 1.11            | ±11.67                |
| liwa/47/100   | 287.48 ±5.28              |                     | 1.05            | ±10.11                |
| liwa/47/100   | 352.76 ±6.12              |                     | 1.05            | ±12.22                |
| liwa/47/100   | 333.51 ±1.48              |                     | 1.04            | ±10.11                |
| liwa/47/100   | 230.87 ±6.02              |                     | 1.10            | ±9.18                 |
| liwa/47/100   | 286.01 ±4.36              |                     | 1.12            | ±9.62                 |
| liwa/47/100   | 213.21 ±6.17              |                     | 1.16            | ±8.88                 |
| liwa/47/100   | 328.75 ±4.16              |                     | 1.08            | ±10.70                |

| <i>Sample</i> | <i>D<sub>e</sub></i> (Gy) | Error (random) (Gy) | Recycling ratio | Error (combined) (Gy) |
|---------------|---------------------------|---------------------|-----------------|-----------------------|
| liwa/166/45   | 188.71 ±10.35             |                     | 1.04            | ±11.80                |
| liwa/166/45   | 211.22 ±14.64             |                     | 1.06            | ±15.96                |
| liwa/166/45   | 228.18 ±20.06             |                     | 0.95            | ±21.20                |
| liwa/166/45   | 262.85 ±24.44             |                     | 0.92            | ±25.68                |
| liwa/166/45   | 269.86 ±24.10             |                     | 1.03            | ±25.42                |
| liwa/166/45   | 345.19 ±53.51             |                     | 0.96            | ±54.51                |
| liwa/166/45   | 465.78 ±82.45             |                     | 0.94            | ±83.62                |

| <i>Sample</i> | <i>D<sub>e</sub></i> (Gy) | Error (random) (Gy) | Recycling ratio | Error (combined) (Gy) |
|---------------|---------------------------|---------------------|-----------------|-----------------------|
| liwa/166/66   | 188.45 ±7.81              |                     | 0.91            | ±9.65                 |
| liwa/166/66   | 206.21 ±17.50             |                     | 0.96            | ±18.56                |
| liwa/166/66   | 208.05 ±14.92             |                     | 1.04            | ±16.17                |
| liwa/166/66   | 208.39 ±2.50              |                     | 1.08            | ±6.73                 |
| liwa/166/66   | 284.29 ±18.69             |                     | 0.99            | ±20.55                |
| liwa/166/66   | 465.85 ±68.76             |                     | 1.08            | ±70.17                |
| liwa/166/66   | 502.04 ±44.18             |                     | 0.95            | ±46.68                |

| <i>Sample</i> | <i>D<sub>e</sub></i> (Gy) | Error (random) (Gy) | Recycling ratio | Error (combined) (Gy) |
|---------------|---------------------------|---------------------|-----------------|-----------------------|
| liwa/305/49   | 81.50 ±2.40               |                     | 0.98            | ±3.43                 |
| liwa/305/49   | 84.18 ±1.79               |                     | 1.01            | ±3.10                 |

|             |              |      |       |
|-------------|--------------|------|-------|
| liwa/305/49 | 87.96 ±1.47  | 1.01 | ±3.02 |
| liwa/305/49 | 89.16 ±2.32  | 0.98 | ±3.54 |
| liwa/305/49 | 91.99 ±3.05  | 0.93 | ±4.11 |
| liwa/305/49 | 92.53 ±1.65  | 0.99 | ±3.23 |
| liwa/305/49 | 93.35 ±8.38  | 0.89 | ±8.83 |
| liwa/305/49 | 96.75 ±4.69  | 1.05 | ±5.51 |
| liwa/305/49 | 101.09 ±2.42 | 1.07 | ±3.88 |
| liwa/305/49 | 101.24 ±7.43 | 0.95 | ±8.03 |
| liwa/305/49 | 101.91 ±3.68 | 1.05 | ±4.78 |
| liwa/305/49 | 103.34 ±2.68 | 0.98 | ±4.10 |
| liwa/305/49 | 104.53 ±4.37 | 1.01 | ±5.38 |
| liwa/305/49 | 106.92 ±1.60 | 1.01 | ±3.58 |
| liwa/305/49 | 111.11 ±3.84 | 0.98 | ±5.08 |
| liwa/305/49 | 111.33 ±4.12 | 0.93 | ±5.30 |
| liwa/305/49 | 113.93 ±2.23 | 0.99 | ±4.08 |
| liwa/305/49 | 115.64 ±6.67 | 0.89 | ±7.52 |
| liwa/305/49 | 116.44 ±6.08 | 1.05 | ±7.01 |
| liwa/305/49 | 118.94 ±5.15 | 1.07 | ±6.27 |
| liwa/305/49 | 119.96 ±7.90 | 0.95 | ±8.68 |
| liwa/305/49 | 124.92 ±1.00 | 1.05 | ±3.88 |
| liwa/305/49 | 129.79 ±6.70 | 0.99 | ±7.75 |
| liwa/305/49 | 192.56 ±6.25 | 0.89 | ±8.51 |

| <i>Sample</i> | <i>D<sub>e</sub></i> (Gy) | Error<br>(random)<br>(Gy) | Recycling ratio | Error<br>(combined)<br>(Gy) |
|---------------|---------------------------|---------------------------|-----------------|-----------------------------|
| liwa/305/52   | 113.05 ±9.85              |                           | 0.92            | ±10.41                      |
| liwa/305/52   | 113.66 ±4.03              |                           | 1.00            | ±5.28                       |
| liwa/305/52   | 122.77 ±9.07              |                           | 1.13            | ±9.79                       |
| liwa/305/52   | 124.02 ±17.75             |                           | 1.04            | ±18.14                      |
| liwa/305/52   | 127.08 ±5.16              |                           | 1.06            | ±6.42                       |
| liwa/305/52   | 151.13 ±16.71             |                           | 0.95            | ±17.31                      |
| liwa/305/52   | 171.08 ±18.43             |                           | 0.92            | ±19.13                      |
| liwa/305/52   | 178.26 ±4.94              |                           | 1.03            | ±7.28                       |
| liwa/305/52   | 180.97 ±16.37             |                           | 0.96            | ±17.25                      |
| liwa/305/52   | 190.93 ±7.47              |                           | 0.87            | ±9.41                       |

| <i>Sample</i> | <i>D<sub>e</sub></i> (Gy) | Error<br>(random)<br>(Gy) | Recycling ratio | Error<br>(combined)<br>(Gy) |
|---------------|---------------------------|---------------------------|-----------------|-----------------------------|
| liwa/305/56   | 105.27 ±10.02             |                           | 1.01            | ±10.51                      |
| liwa/305/56   | 145.72 ±10.94             |                           | 0.98            | ±11.78                      |
| liwa/305/56   | 193.05 ±5.37              |                           | 0.93            | ±7.90                       |
| liwa/305/56   | 209.25 ±15.57             |                           | 0.99            | ±16.78                      |
| liwa/305/56   | 214.54 ±8.22              |                           | 0.89            | ±10.44                      |
| liwa/305/56   | 215.64 ±19.29             |                           | 1.05            | ±20.35                      |
| liwa/305/56   | 220.18 ±11.53             |                           | 1.07            | ±13.29                      |
| liwa/305/56   | 227.24 ±2.36              |                           | 0.92            | ±7.21                       |
| liwa/305/56   | 272.27 ±23.04             |                           | 1.02            | ±24.45                      |
| liwa/305/56   | 288.05 ±23.51             |                           | 1.09            | ±25.05                      |
| liwa/305/56   | 380.28 ±192.23            |                           | 0.94            | ±192.57                     |

| <i>Sample</i> | $D_e$ (Gy)    | Error (random) (Gy) | Recycling ratio | Error (combined) (Gy) |
|---------------|---------------|---------------------|-----------------|-----------------------|
| Liwa/pit/6    | 139.63 ±11.46 |                     | 1.04            | ±12.20                |
| Liwa/pit/6    | 152.89 ±8.67  |                     | 1.06            | ±9.81                 |
| Liwa/pit/6    | 156.87 ±3.73  |                     | 0.95            | ±6.00                 |
| Liwa/pit/6    | 161.15 ±5.91  |                     | 0.92            | ±7.64                 |
| Liwa/pit/6    | 164.22 ±4.16  |                     | 0.99            | ±6.45                 |
| Liwa/pit/6    | 189.99 ±13.06 |                     | 1.01            | ±14.25                |
| Liwa/pit/6    | 195.16 ±6.58  |                     | 0.93            | ±8.81                 |
| Liwa/pit/6    | 312.56 ±13.66 |                     | 0.94            | ±16.57                |

| <i>Sample</i> | $D_e$ (Gy)    | Error (random) (Gy) | Recycling ratio | Error (combined) (Gy) |
|---------------|---------------|---------------------|-----------------|-----------------------|
| Liwa/pit/7    | 120.92 ±5.80  |                     | 1.01            | ±6.84                 |
| Liwa/pit/7    | 154.76 ±7.04  |                     | 1.14            | ±8.43                 |
| Liwa/pit/7    | 156.28 ±10.61 |                     | 0.97            | ±11.60                |
| Liwa/pit/7    | 156.64 ±6.95  |                     | 1.13            | ±8.39                 |
| Liwa/pit/7    | 159.10 ±10.13 |                     | 1.15            | ±11.20                |
| Liwa/pit/7    | 163.86 ±6.50  |                     | 0.92            | ±8.15                 |
| Liwa/pit/7    | 165.53 ±12.71 |                     | 0.91            | ±13.64                |
| Liwa/pit/7    | 169.54 ±6.14  |                     | 1.11            | ±7.97                 |
| Liwa/pit/7    | 179.27 ±11.51 |                     | 1.10            | ±12.71                |
| Liwa/pit/7    | 183.55 ±11.80 |                     | 0.91            | ±13.02                |
| Liwa/pit/7    | 189.20 ±5.03  |                     | 0.98            | ±7.58                 |
| Liwa/pit/7    | 190.33 ±13.30 |                     | 1.05            | ±14.47                |
| Liwa/pit/7    | 192.75 ±4.73  |                     | 0.87            | ±7.47                 |
| Liwa/pit/7    | 210.44 ±13.32 |                     | 1.04            | ±14.74                |
| Liwa/pit/7    | 235.17 ±8.24  |                     | 0.86            | ±10.85                |

| <i>Sample</i> | $D_e$ (Gy)    | Error (random) (Gy) | Recycling ratio | Error (combined) (Gy) |
|---------------|---------------|---------------------|-----------------|-----------------------|
| Liwa/pit/8    | 119.31 ±3.87  |                     | 1.03            | ±5.27                 |
| Liwa/pit/8    | 121.41 ±7.94  |                     | 1.12            | ±8.74                 |
| Liwa/pit/8    | 123.78 ±1.98  |                     | 1.07            | ±4.21                 |
| Liwa/pit/8    | 140.05 ±3.15  |                     | 1.08            | ±5.25                 |
| Liwa/pit/8    | 149.43 ±7.70  |                     | 0.92            | ±8.91                 |
| Liwa/pit/8    | 164.19 ±8.07  |                     | 1.05            | ±9.46                 |
| Liwa/pit/8    | 171.01 ±3.37  |                     | 1.07            | ±6.14                 |
| Liwa/pit/8    | 184.44 ±5.24  |                     | 0.95            | ±7.62                 |
| Liwa/pit/8    | 201.53 ±7.70  |                     | 1.12            | ±9.79                 |
| Liwa/pit/8    | 203.62 ±3.53  |                     | 1.06            | ±7.05                 |
| Liwa/pit/8    | 211.86 ±5.80  |                     | 0.92            | ±8.61                 |
| Liwa/pit/8    | 237.61 ±12.23 |                     | 1.05            | ±14.16                |
| Liwa/pit/8    | 265.15 ±13.89 |                     | 0.98            | ±16.00                |
| Liwa/pit/8    | 292.33 ±23.52 |                     | 1.05            | ±25.10                |

| <i>Sample</i> | $D_e$ (Gy)    | Error (random) (Gy) | Recycling ratio | Error (combined) (Gy) |
|---------------|---------------|---------------------|-----------------|-----------------------|
| liwa/pit/9    | 242.04 ±17.65 |                     | 1.00            | ±19.09                |
| liwa/pit/9    | 147.15 ±2.88  |                     | 1.02            | ±5.27                 |

|            |               |      |        |
|------------|---------------|------|--------|
| liwa/pit/9 | 131.64 ±5.12  | 1.02 | ±6.46  |
| liwa/pit/9 | 298.71 ±17.01 | 0.91 | ±19.23 |
| liwa/pit/9 | 249.44 ±15.60 | 0.92 | ±17.31 |
| liwa/pit/9 | 189.40 ±19.79 | 1.05 | ±20.59 |
| liwa/pit/9 | 157.00 ±8.02  | 0.94 | ±9.30  |

| <i>Sample</i> | <i>D<sub>e</sub></i> (Gy) | Error (random) (Gy) | Recycling ratio | Error (combined) (Gy) |
|---------------|---------------------------|---------------------|-----------------|-----------------------|
| liwa/pit/10   | 104.74 ±6.08              |                     | 1.04            | ±6.84                 |
| liwa/pit/10   | 107.36 ±4.69              |                     | 1.06            | ±5.69                 |
| liwa/pit/10   | 129.22 ±9.86              |                     | 1.01            | ±10.59                |
| liwa/pit/10   | 167.81 ±13.06             |                     | 1.05            | ±14.00                |
| liwa/pit/10   | 180.05 ±26.98             |                     | 1.03            | ±27.51                |
| liwa/pit/10   | 190.45 ±5.06              |                     | 1.09            | ±7.63                 |
| liwa/pit/10   | 194.10 ±8.99              |                     | 1.05            | ±10.71                |

| <i>Sample</i> | <i>D<sub>e</sub></i> (Gy) | Error (random) (Gy) | Recycling ratio | Error (combined) (Gy) |
|---------------|---------------------------|---------------------|-----------------|-----------------------|
| liwa/pit/11   | 116.61 ±3.22              |                     | 0.92            | ±4.76                 |
| liwa/pit/11   | 125.05 ±3.21              |                     | 1.00            | ±4.94                 |
| liwa/pit/11   | 179.72 ±11.59             |                     | 1.13            | ±12.78                |
| liwa/pit/11   | 194.72 ±5.85              |                     | 1.04            | ±8.27                 |
| liwa/pit/11   | 130.76 ±11.33             |                     | 1.06            | ±11.99                |
| liwa/pit/11   | 168.84 ±5.91              |                     | 0.95            | ±7.78                 |
| liwa/pit/11   | 138.54 ±7.17              |                     | 0.92            | ±8.29                 |

| <i>Sample</i> | <i>D<sub>e</sub></i> (Gy) | Error (random) (Gy) | Recycling ratio | Error (combined) (Gy) |
|---------------|---------------------------|---------------------|-----------------|-----------------------|
| liwa/pit/12   | 205.77 ±8.42              |                     | 1.01            | ±10.44                |
| liwa/pit/12   | 148.85 ±3.62              |                     | 0.97            | ±5.75                 |
| liwa/pit/12   | 199.48 ±15.31             |                     | 1.04            | ±16.44                |
| liwa/pit/12   | 178.71 ±19.08             |                     | 1.06            | ±19.82                |
| liwa/pit/12   | 175.34 ±6.41              |                     | 1.02            | ±8.29                 |
| liwa/pit/12   | 132.79 ±4.91              |                     | 0.99            | ±6.33                 |
| liwa/pit/12   | 291.94 ±8.87              |                     | 0.97            | ±12.47                |
| liwa/pit/12   | 192.84 ±21.77             |                     | 1.08            | ±22.53                |

| <i>Sample</i> | <i>D<sub>e</sub></i> (Gy) | Error (random) (Gy) | Recycling ratio | Error (combined) (Gy) |
|---------------|---------------------------|---------------------|-----------------|-----------------------|
| liwa/pit/13   | 164.91 ±7.00              |                     | 1.01            | ±8.57                 |
| liwa/pit/13   | 145.76 ±13.92             |                     | 0.96            | ±14.59                |
| liwa/pit/13   | 479.63 ±102.31            |                     | 1.07            | ±103.32               |
| liwa/pit/13   | 161.81 ±7.10              |                     | 1.00            | ±8.60                 |
| liwa/pit/13   | 134.57 ±4.00              |                     | 1.04            | ±5.69                 |
| liwa/pit/13   | 258.83 ±12.83             |                     | 0.93            | ±15.00                |
| liwa/pit/13   | 143.54 ±4.40              |                     | 0.98            | ±6.16                 |

| <i>Sample</i> | <i>D<sub>e</sub></i> (Gy) | Error (random) (Gy) | Recycling ratio | Error (combined) (Gy) |
|---------------|---------------------------|---------------------|-----------------|-----------------------|
| liwa/pit/14   | 169.09 ±7.44              |                     | 0.95            | ±9.01                 |

|             |               |      |        |
|-------------|---------------|------|--------|
| liwa/pit/14 | 186.49 ±38.44 | 0.92 | ±38.84 |
| liwa/pit/14 | 139.26 ±17.58 | 1.02 | ±18.07 |
| liwa/pit/14 | 149.32 ±12.16 | 1.01 | ±12.96 |

| <i>Sample</i> | <i>D<sub>e</sub></i> (Gy) | Error<br>(random)<br>(Gy) | Recycling ratio | Error<br>(combined)<br>(Gy) |
|---------------|---------------------------|---------------------------|-----------------|-----------------------------|
| liwa/pit/15   | 123.99 ±3.87              |                           | 1.08            | ±5.37                       |
| liwa/pit/15   | 198.97 ±2.88              |                           | 1.13            | ±6.63                       |
| liwa/pit/15   | 217.36 ±5.40              |                           | 1.06            | ±8.47                       |
| liwa/pit/15   | 212.86 ±9.09              |                           | 1.09            | ±11.11                      |
| liwa/pit/15   | 210.56 ±4.03              |                           | 1.06            | ±7.50                       |
| liwa/pit/15   | 178.48 ±10.06             |                           | 1.15            | ±11.40                      |
| liwa/pit/15   | 201.98 ±3.95              |                           | 1.06            | ±7.23                       |
| liwa/pit/15   | 192.97 ±9.20              |                           | 1.09            | ±10.87                      |

| <i>Sample</i> | <i>D<sub>e</sub></i> (Gy) | Error<br>(random)<br>(Gy) | Recycling ratio | Error<br>(combined)<br>(Gy) |
|---------------|---------------------------|---------------------------|-----------------|-----------------------------|
| liwa/pit/16   | 175.80 ±6.38              |                           | 0.86            | ±8.27                       |
| liwa/pit/16   | 173.15 ±4.07              |                           | 1.00            | ±6.60                       |
| liwa/pit/16   | 199.70 ±2.21              |                           | 0.87            | ±6.39                       |
| liwa/pit/16   | 169.89 ±5.77              |                           | 1.07            | ±7.70                       |
| liwa/pit/16   | 193.62 ±6.61              |                           | 0.99            | ±8.80                       |
| liwa/pit/16   | 180.67 ±7.64              |                           | 1.00            | ±9.37                       |
| liwa/pit/16   | 308.67 ±10.12             |                           | 1.06            | ±13.72                      |

| <i>Sample</i> | <i>D<sub>e</sub></i> (Gy) | Error<br>(random)<br>(Gy) | Recycling ratio | Error<br>(combined)<br>(Gy) |
|---------------|---------------------------|---------------------------|-----------------|-----------------------------|
| liwa/pit/17   | 280.65 ±13.97             |                           | 0.98            | ±16.31                      |
| liwa/pit/17   | 123.93 ±2.63              |                           | 1.07            | ±4.55                       |
| liwa/pit/17   | 244.80 ±16.01             |                           | 1.06            | ±17.61                      |
| liwa/pit/17   | 231.52 ±7.94              |                           | 1.02            | ±10.55                      |
| liwa/pit/17   | 191.26 ±5.05              |                           | 1.00            | ±7.65                       |
| liwa/pit/17   | 160.02 ±9.63              |                           | 1.04            | ±10.76                      |
| liwa/pit/17   | 216.41 ±41.85             |                           | 0.99            | ±42.35                      |
| liwa/pit/17   | 181.89 ±10.73             |                           | 1.02            | ±12.04                      |
